1      Role of the mobilome in the global dissemination  
2                      of the carbapenem resistance gene *bla*<sub>NDM</sub>

3      Mislav Acman<sup>1</sup>, Ruobing Wang<sup>2</sup>, Lucy van Dorp<sup>1</sup>, Liam P. Shaw<sup>3</sup>, Qi Wang<sup>2</sup>, Nina Luhmann<sup>4</sup>, Yuyao Yin<sup>2</sup>,  
4                      Shijun Sun<sup>2</sup>, Hongbin Chen<sup>2</sup>, Hui Wang<sup>2</sup>, Francois Balloux<sup>1</sup>

5      1 UCL Genetics Institute, University College London, Gower Street, London, WC1E 6BT, UK

6      2 Department of Clinical Laboratory, Peking University People's Hospital, Beijing, 100044, China

7      3 Nuffield Department of Medicine, John Radcliffe Hospital, University of Oxford, Oxford OX3 9DU, UK

8      4 Warwick Medical School, University of Warwick, Coventry CV4 7AL, UK

## 9 Abstract (149 words)

10 The mobile resistance gene *bla<sub>NDM</sub>* encodes the NDM enzyme capable of hydrolysing carbapenems, a class of  
11 antibiotics used to treat some of the most severe bacterial infections. *bla<sub>NDM</sub>* is globally distributed across a variety  
12 of Gram-negative bacteria and is typically located within a transposon-rich genomic region common to multiple  
13 plasmids. We compiled a dataset of over 2000 bacterial genomes harbouring the *bla<sub>NDM</sub>* gene including 112 new  
14 PacBio hybrid assemblies from China and developed a novel computational approach to track structural variants  
15 in bacterial genomes. We were able to correlate specific structural variants with plasmid backbones, bacterial host  
16 species and sampling locations, and identified multiple transposition events that occurred during the global  
17 dissemination of *bla<sub>NDM</sub>*. Our results highlight the importance of transposons in the global spread of antimicrobial  
18 resistance genes and suggest that genetic recombination, rather than mutation, was the dominant force driving the  
19 evolution of the *bla<sub>NDM</sub>* genomic region.

## 20 Introduction

21 The increasing burden of antimicrobial resistance (AMR) poses a major challenge to human and veterinary health.  
22 AMR can be conferred by vertically inherited point mutations or via the acquisition of horizontally transmitted  
23 non-essential ‘accessory’ genes generally located in transposons and plasmids. The *bla<sub>NDM</sub>* gene encoding the  
24 NDM enzyme, a metallo- $\beta$ -lactamase capable of hydrolysing most  $\beta$ -lactam antibiotics represents a typical  
25 example of a mobile antibiotic resistance gene (Wu et al., 2019). Compounds belonging to the carbapenem class  
26 are commonly employed to treat Gram-negative bacterial infections resistant to mainstay antibiotics and used as  
27 first-line treatment for severe infections. The global prevalence of bacteria carrying *bla<sub>NDM</sub>*, including  
28 carbapenem-resistant *Acinetobacter baumannii* and *Enterobacteriaceae* in hospital settings, represents a major  
29 public health concern.

30 The *bla<sub>NDM</sub>* gene was first identified in 2008 from a *Klebsiella pneumoniae* isolated from a urinary tract infection  
31 in a Swedish patient returning from New Delhi, India (Yong et al., 2009). While *bla<sub>NDM</sub>* now has a worldwide  
32 distribution, most of the earliest cases have been linked to the Indian subcontinent, suggesting this region as a  
33 likely location for the initial mobilisation event (Castanheira et al., 2011; Kumarasamy et al., 2010; Poirel, Dortet,  
34 et al., 2011; Struelens et al., 2010; Wu et al., 2019). Notably, NDM-positive *Acinetobacter baumannii* isolates  
35 have been retrospectively identified from an Indian hospital in 2005 (Jones et al., 2014), which remain the earliest  
36 observations to date. However, an NDM-positive *A. pittii* isolate was also isolated in 2006 from a Turkish patient  
37 with no history of travel outside Turkey (Roca et al., 2014).

38 Although no complete genome sequences are publicly available from these earliest observations, the first NDM-  
39 positive isolates from 2005 were shown to carry *bla<sub>NDM</sub>* on multiple non-conjugative, but potentially mobilizable  
40 plasmid backbones (Jones et al., 2014). In addition, *bla<sub>NDM</sub>* in these early isolates was positioned within a complete  
41 *Tn125* transposon with existing ISCR27 and IS26 insertion sequences (ISs), suggesting the possibility of complex  
42 patterns of mobility since the gene’s initial integration. Subsequent NDM-positive isolates, spanning a range of  
43 species, consistently harbour either a complete or fragmented IS*Aba125* (an IS constituting *Tn125*), which is  
44 always found immediately upstream of *bla<sub>NDM</sub>* providing a promoter region for the gene transcription (Poirel,  
45 Bonnin, et al., 2011; Poirel, Dortet, et al., 2011; Toleman et al., 2012; Wu et al., 2019). The presence of IS*Aba125*,  
46 in some form, in all NDM-positive isolates to date, as well as the majority of the early observations being in *A.*  
47 *baumannii*, has led to *Tn125* being proposed as the likely transposon responsible for the initial mobilization of  
48 *bla<sub>NDM</sub>*, and *A. baumannii* as the ancestral host.

49 In addition, the NDM enzyme itself has been described as of possible chimeric origin (Partridge & Iredell, 2012;  
50 Toleman et al., 2012), with the first six amino acids in NDM matching to those in *aphA6*, a gene providing  
51 aminoglycoside resistance and also flanked by IS*Aba125*. It is presumed that ISCR27, an IS which uses a rolling-  
52 circle (RC) transposition mechanism (Ilyina, 2012; Toleman et al., 2006), initially mobilized a progenitor of  
53 *bla<sub>NDM</sub>* in *Xanthomonas sp.* and placed it downstream of IS*Aba125* (Partridge & Iredell, 2012; Poirel et al., 2012;  
54 Sekizuka et al., 2011; M A Toleman, Spencer, Jones, & Walsh, 2012). The NDM enzyme itself displays some  
55 polymorphism, with at least 29 distinct sequence variants having been described to date. The most prevalent of  
56 these variants is the first to have been characterised, and is denoted NDM-1 (Basu, 2020). Different NDM variants

57 are mostly distinguished by a single amino-acid substitution, with the exception of NDM-18 which carries a  
58 tandem repeat of five amino acids. None of the observed substitutions occur in the active site and the functional  
59 impact of each of these substitutions remains under debate (Wu et al., 2019).

60 At present, NDM resistance is globally distributed and represents a major concern in healthcare settings. The gene  
61 is found in at least 11 bacterial families and NDM-positive isolates have heterogeneous clonal backgrounds,  
62 supporting multiple independent acquisitions of *bla<sub>NDM</sub>* (Wu et al., 2019). The *bla<sub>NDM</sub>* gene has been observed on  
63 bacterial chromosomes (Baraniak et al., 2016; Rahman et al., 2018) but is most commonly harboured on plasmids,  
64 comprising multiple different backbones or types. Furthermore, even within the same plasmid types, *bla<sub>NDM</sub>* is  
65 found in a variety of genetic contexts, often interspersed by multiple ISs and composite transposons (Partridge &  
66 Iredell, 2012; Wu et al., 2019). The immediate genetic environment of *bla<sub>NDM</sub>* has been reported to vary even in  
67 isolates from the same patient (Wailan et al., 2015). It is therefore clear that the emergence and subsequent  
68 dissemination of NDM resistance, through a multitude of bacterial host species, is a dynamic and multi-layer  
69 process involving multiple mobile genetic elements – ‘the mobilome’ – which abetted the mobility of *bla<sub>NDM</sub>* via  
70 a diverse set of processes, including genetic recombination, transposition, conjugation, transformation, and  
71 transfer through outer-membrane vesicles (OMVs) (Chatterjee et al., 2017; González et al., 2016; Huang et al.,  
72 2013; Lynch et al., 2016).

73 In this work, we reconstruct the individual roles of plasmids and ISs in the dissemination of NDM and provide a  
74 comprehensive overview of the many genetic backgrounds harbouring the *bla<sub>NDM</sub>* gene. To this end, we compiled  
75 a global dataset of more than 2000 NDM-positive isolates including 112 newly generated hybrid PacBio  
76 assemblies sampled from clinical and livestock settings across China. In order to decompose the high sequence  
77 complexity of the immediate genomic contexts of *bla<sub>NDM</sub>* in our large global dataset, we developed a novel  
78 alignment-based method designed to uncover all structural variations flanking *bla<sub>NDM</sub>*. This allowed us to pinpoint  
79 individual insertion events for subsequent assessment. Correlating specific structural variants with plasmid  
80 backbones, bacterial host genera and sampling locations, we are able to uncover transposition events underlying  
81 the global spread of *bla<sub>NDM</sub>*. We identify *Tn125*, *Tn3000* and *IS26* as the main contributors to *bla<sub>NDM</sub>* mobility.  
82 Furthermore, we provide evidence for genetic recombination being the main force driving evolution in this region.  
83 We also identify plasmid backbones and bacterial hosts closely associated with specific sampling locations, as  
84 well as an apparent plateau in the rate of spread of *bla<sub>NDM</sub>* around 2014. Our findings position plasmids as the  
85 main contributors to the local transmission of *bla<sub>NDM</sub>*, while transposons seem to be more influential for spread at  
86 a global scale.

## 87 Results

88

### 89 A global dataset of *bla*<sub>NDM</sub> carriers

90 To study the genetic context and global spread of the *bla*<sub>NDM</sub> resistance gene, a dataset of 2,148 bacterial genomes  
91 (2,166 contigs) carrying at least one copy of *bla*<sub>NDM</sub> were compiled from multiple sources (Figure 1). These  
92 include: 795 bacterial genomes assembled using short read *de novo* assembly methods; 113 bacterial genomes  
93 using hybrid PacBio-Illumina *de novo* assembly; and 1,240 RefSeq assemblies (See Methods, Supplementary  
94 Table 1). Of the included *de novo* hybrid assemblies, 112 were newly generated for this study isolated from  
95 hospitalized patients across China and 25 livestock farms. Overall, the dataset includes NDM-positive genomes  
96 sampled across 67 states (Figure 1A). The majority of isolates were collected in East and South East Asian  
97 countries with mainland China representing the predominant source of origin ( $n=668$ ). A wide range of bacterial  
98 species were represented with *Klebsiella* and *Escherichia* the primary genera each contributing 899 and 667  
99 genomes, respectively (Figure 1B; Supplementary Data 1).

100 The majority of *bla*<sub>NDM</sub> carriers in the global dataset were collected between 2014-2017 (74.41%, Figure 1C).  
101 However, the dataset also includes 31 genomes from 2010 and earlier. These include the *K. pneumoniae* isolate  
102 from 2008 in which *bla*<sub>NDM</sub> was first characterized (Yong et al., 2009), as well as an earlier *A. baumannii* isolate  
103 from 2007 in an individual of Balkan origin in Germany (Bonnin et al., 2012; Sahl et al., 2015) (Supplementary  
104 Data 1).

105 A substantial number of contigs isolated from our dataset were sufficient in length to enable identification of  
106 putative plasmid backbones carrying *bla*<sub>NDM</sub> (Supplementary Figure 1; See Methods). Within our filtered dataset  
107 comprising 2,142 contigs (see Methods), we identified 482 replicon types using PlasmidFinder (Carattoli et al.,  
108 2014) and 194 circularized contigs in our dataset, of which 43 did not have a known replicon type. This resulted  
109 in a total of 525 putative plasmid sequences which also comprised 96 contigs (70 circularized) from our hybrid  
110 PacBio-Illumina assemblies. Overall, 32 different plasmid replicon types were identified among *bla*<sub>NDM</sub>-  
111 containing plasmid sequences (Figure 1D). The most prevalent replicon type was IncX3, found in almost half  
112 (253/525, 48%) of the included sequences. Nevertheless, the notable range in plasmid backbones harbouring  
113 *bla*<sub>NDM</sub> indicates a high recombination and/or transposition rate of the *bla*<sub>NDM</sub> gene. At the same time, we observe  
114 some geographic structure in plasmid replicon types (Supplementary Figure 2) signalling the importance of  
115 transposon movement in the cross-continental spread of NDM-mediated resistance.

116

### 117 Resolving structural variants in the *bla*<sub>NDM</sub> flanking regions

118 To gain a detailed overview of the transposition events and different genetic backgrounds harbouring *bla*<sub>NDM</sub> we  
119 developed an alignment-based approach to resolve structural variation in the genetic regions flanking *bla*<sub>NDM</sub> (see  
120 Methods, Figure 2). In brief, a pairwise discontinuous Mega BLAST search (v2.10.1+) (Camacho et al., 2009;  
121 Ma et al., 2002) was applied to all *bla*<sub>NDM</sub>-containing contigs in order to identify all possible homologous regions  
122 between each contig pair. Only BLAST hits covering the complete *bla*<sub>NDM</sub> gene were retained (Figure 2A). Next,  
123 starting from *bla*<sub>NDM</sub>, a gradually increasing ‘splitting threshold’ was introduced to monitor structural variants as

124 they appeared upstream or downstream of the gene. At each step, a network is constructed connecting contigs  
125 (nodes) that share a BLAST hit with a minimum length as given by the ‘splitting threshold’ (Figure 2B). As we  
126 move upstream or downstream and further away from the gene, the network starts to split into smaller clusters  
127 each carrying contigs that share an uninterrupted stretch of homologous DNA. The splitting is visualized as a tree  
128 where branch lengths are scaled to match the position within the sequence, and the thickness and the colour  
129 intensity of the branches corresponds to the number of sequences which are homologous (Figure 2C). Given the  
130 approach uses the *bla<sub>NDM</sub>* gene as an anchor, it enables comparison between BLAST hits, but also limits the  
131 comparison to either upstream or downstream flanking region and not both simultaneously.

132 The flanking region upstream of *bla<sub>NDM</sub>* breaks down rather quickly: within a few hundred base pairs of the *bla<sub>NDM</sub>*  
133 start codon, the upstream flanking region splits into multiple structural variants, none of which dominates the  
134 contig pool (Supplementary Figure 3). For instance, 99 different structural variants were identified only 1200 bp  
135 from the *bla<sub>NDM</sub>* start codon. This high variation in genome structure could be attributed to the many genetic  
136 backgrounds in which *bla<sub>NDM</sub>* is found as well as frequent genome rearrangements (Supplementary Figures 3).  
137 The significance of the latter is also reflected by the number of fragments and complete insertion sequences present  
138 in the region, including *IS<sub>Aba125</sub>* (132), *IS5* (385), *IS3000* (88), *ISK<sub>pn14</sub>* (44), and *ISEc33* (72), as well as almost  
139 half the contigs (1,003, 46.93%) being excluded from the analysis for having too short an upstream flank  
140 (Supplementary Figure 3). The transposition hotspot upstream of *bla<sub>NDM</sub>* possibly hinders sequencing and genome  
141 assembly efforts and enhances the presence of these short contig flanks. In agreement with previous work (Poirel,  
142 Bonnin, et al., 2011; Poirel, Dortet, et al., 2011; Toleman et al., 2012; Wu et al., 2019), more than 95% of  
143 sufficiently long contigs include a ~75 bp fraction of *IS<sub>Aba125</sub>*, supporting the notion of *Tn125* as an ancestral  
144 transposon of the *bla<sub>NDM</sub>* gene (Supplementary Figures 3 and 4).

145 The downstream flanking region exhibits more gradual structural diversification than the upstream region, with  
146 one dominant putative ancestral background (Figure 3). As illustrated by the stem of the tree of structural  
147 variations (Supplementary Figure 5), many of the 2,142 contigs analysed contain complete sequences of the same  
148 genes: *ble* (2,047 contigs), *trpF* (1,770), *dsbD* (1,660), *cutA* (858), *groS* (673), *groL* (527). In total there are 1,229  
149 contigs which are sufficiently long downstream of *bla<sub>NDM</sub>* to harbour the full repertoire of the aforementioned  
150 genes. When the analysis is restricted to those contigs of sufficient length, 42.9% of NDM-positive contigs carry  
151 this full suite of genes downstream of *bla<sub>NDM</sub>*.

152

### 153 Patterns of insertion events in *bla<sub>NDM</sub>* flanking regions

154 Having reconstructed structural variation in the *bla<sub>NDM</sub>* upstream (Supplementary Figure 3) and downstream  
155 (Figure 3) flanking regions, we did not observe any strong overall signal in the distribution of associated plasmid  
156 backbones, bacterial genera and sampling locations. However, closer examination of structural variants common  
157 to sufficiently large pools of isolates allow distinct observations to be made. These more specific observations  
158 appear to correlate to the events underlying the spread of *bla<sub>NDM</sub>*. For instance, *IS3000* is found in 88 and 35  
159 contigs on the upstream and downstream flanking regions respectively, almost exclusively in *Klebsiella* host  
160 species and often on IncF plasmids (Figure 3 and Supplementary Figure 3). Thus, as previously suggested by

161 Campos et al., Tn3000 likely re-mobilized *bla*<sub>NDM</sub>, following the fossilization of Tn125 (Campos et al., 2015);  
162 our analysis suggests the secondary mobilization primarily happened in *Klebsiella* species.

163 Some structural variants appear geographically linked e.g., IS5 is predominantly found upstream of *bla*<sub>NDM</sub> on  
164 IncX3 plasmids from East Asia (Supplementary Figure 3), with none of these plasmids with IS5 having a matching  
165 element on the downstream flanking region of *bla*<sub>NDM</sub> to form a full composite transposon. IS5 is known to  
166 enhance transcription of nearby promoters in *E. coli* (Schnetz & Rak, 1992) and its abundance and positioning  
167 just upstream of *bla*<sub>NDM</sub> suggests it may have assumed a similar role in this case. Interestingly, the NDM-5 variant  
168 has been increasing in numbers in recent years (Supplementary Figure 6 A and B) and is mostly associated with  
169 both IncX3 plasmids (Supplementary Figure 6 C and D) and isolates from East Asia (Supplementary Figure 6 G  
170 and H). Thus, an increasing abundance of NDM-5 could be due to the aforementioned enhanced transcription  
171 caused by the proximity to IS5. Other structural variants are observed across many global regions e.g., the *wapA*  
172 gene is found truncating ISCR27 downstream on IncC plasmids (Figure 3).

173 One of the most commonly found transposable elements in the flanking regions (~30% prevalence) is an ISCR1-  
174 like transposase (IS91 family transposase), hereafter referred to as ISCR1, coupled with the *folP* gene (Figure 3,  
175 Supplementary Figure 5). This configuration is found at various positions downstream of *bla*<sub>NDM</sub> and often  
176 associated to IncF plasmids identified in *Escherichia* and *Klebsiella* species. In most cases, the orientation of  
177 ISCR1 should prevent this element from mobilizing *bla*<sub>NDM</sub> (Ilyina, 2012), so it appears its role is to disrupt the  
178 surrounding IS elements and transposons. Interestingly, ISCR1s are mainly found in complex class 1 integrons  
179 (Ilyina, 2012), however, not many annotated integrase genes are located within the vicinity of *bla*<sub>NDM</sub>. In fact,  
180 only 11 contigs were found to have an integrase <50 Kb away from *bla*<sub>NDM</sub> and none showed any consistency in  
181 how the integrase is placed with respect to *bla*<sub>NDM</sub>. This may suggest integrons play at most a minor role in the  
182 dissemination of *bla*<sub>NDM</sub>.

183 Another notable ISCR element is ISCR27 which is consistently found immediately downstream of the *groL* gene  
184 (Figure 3, Supplementary Figure 5). The complete ISCR27 sequence is carried by 316 contigs, with another 211  
185 contigs containing a fragmentary sequence. ISCR27 is found at high prevalence with 30.1% of sufficiently long  
186 contigs harbouring this element. Contrary to its ISCR1-like relative, ISCR27 is correctly oriented to mobilize  
187 *bla*<sub>NDM</sub> as is presumed to have happened during the initial mobilization of the progenitor of *bla*<sub>NDM</sub> (Toleman et  
188 al., 2012). However, we find no evidence of subsequent ISCR27 mobility. The origin of rolling-circle replication  
189 of ISCR27 (*oriIS*; GCGGTTGAACTTCCTATAACC) is located 236 bp downstream of the ISCR27 transposase  
190 stop codon. The region downstream of this stop codon in all structural variants bearing a complete ISCR27 is  
191 highly conserved for at least 750 bp (Figure 3, Supplementary Figure 5). This suggests a reasonably conserved  
192 genetic background surrounding ISCR27 as *bla*<sub>NDM</sub> has been disseminated.

193 Surprisingly, only 58 contigs carried a complete *ISAbal25* downstream of *bla*<sub>NDM</sub>, of which 53 carried an  
194 *ISAbal25* sequence in proximity (<7886 bp) to the *bla*<sub>NDM</sub> start codon. These account for a minority (7.4%) of  
195 isolates when sufficiently long contigs are considered. Forty-five of these contigs contained a complete *ISAbal25*  
196 both upstream and downstream of *bla*<sub>NDM</sub> thus forming a complete Tn125 transposon. Even though the diversity  
197 of bacterial genera carrying *ISAbal25* upstream is substantial (Supplementary Figure 3), the less preserved  
198 downstream *ISAbal25* sequence is mostly found in the genera *Acinetobacter* and *Klebsiella* (Figure 3). This

199 supports the initial dissemination of *bla*<sub>NDM</sub> by Tn125 to other plasmid backbones predominately being mediated  
200 by these two genera, after which the transposon was disrupted by other rearrangements.

201 We note that more than 500 contigs were truncated around 3000 bp downstream of *bla*<sub>NDM</sub> (Figure 3). To  
202 investigate the reasons behind this distinct cut-off point, we used 447 raw short-read sequencing samples from  
203 our dataset (originally downloaded from SRA, see Methods) with contigs that carry *bla*<sub>NDM</sub> longer than 3000bp  
204 (Supplementary Table 1). We compared the normalized number of reads with overhangs mapping to the end of  
205 contigs ending 3000-3200 bp and longer contigs, ending >3200 bp downstream of *bla*<sub>NDM</sub> (Supplementary Figure  
206 7A). On average, the normalized number of overhangs is two times higher in shorter contigs, which indicates that  
207 a particular genetic region mapped by the overhanging reads is often present in more than one copy. Moreover,  
208 when mapped back to the assembled contigs, the overhanging reads of shorter contigs are found on average on  
209 three different contigs (>1000 bp) – twice as many as observed for longer contigs (Supplementary Figure 7B).  
210 The presence of these overhanging reads on multiple contigs may point to within-isolate  
211 transposition/rearrangement events between plasmids and/or bacterial genomes which seem to localise around  
212 this region.

213 The shorter contigs (3000-3200 bp) are found across genera of *Enterobacteriaceae* including *Escherichia*,  
214 *Klebsiella*, *Enterobacter*, *Citrobacter*, *Leclercia* and *Lelliottia*. What is more, the overhanging reads of shorter  
215 contigs almost exclusively match the left inverted repeat (IRL) of IS26 sequence. In fact, over one third (157;  
216 35.1%) of all analysed contigs' overhanging reads correspond to IS26 IRL. IS26, although often found in two  
217 adjacent copies forming a seemingly composite transposon, is a so-called pseudo-composite (or pseudo-  
218 compound) transposon (Harmer et al., 2020). In contrast to composite transposons, a fraction of DNA flanked by  
219 the two IS26 is mobilized either via cointegrate formation or in the form of a translocatable unit (TU), which  
220 consists of a single IS26 element and a mobilized fraction of DNA, and inserts preferentially next to another IS26  
221 (Harmer et al., 2014, 2020). Interestingly, no IS26 sequences were found upstream within contigs whose  
222 downstream overhanging reads match to IS26. Assembly procedures are known to struggle with allele  
223 duplications which may explain the lack of IS26 sequences upstream and the surge of truncated contigs (Sohn &  
224 Nam, 2018). Nevertheless, the results above suggest an active within-isolate movement of *bla*<sub>NDM</sub> via IS26 across  
225 *Enterobacteriaceae*.

226 In total, we identified 208 putative composite transposons (i.e., stretches of DNA flanked by at least two ISs  
227 enclosing *bla*<sub>NDM</sub> <30 Kb apart) in 181 contigs. These comprised 18 different types with the five most frequent  
228 being: IS26 (62 instances), IS*Aba125* (forming Tn125; 55 instances), IS3000 (forming Tn3000; 52), IS15 (13),  
229 IS6100 (7). Interestingly, there are 38 cases where >2 of the same IS flank *bla*<sub>NDM</sub>. These are mostly IS26 (23).  
230 Also, only 137 of the 208 putative transposons identified contained both complete flanking ISs, while others had  
231 at least one IS partially truncated. Importantly, IS26, IS6100 and IS15, a known variant of IS26, are  
232 phylogenetically related with all three falling into clade I of the IS6 family of insertion sequences whose members  
233 are known to mobilize via cointegrate formation, as discussed above (Harmer & Hall, 2019). The IS26s we  
234 identify are found at different positions in the alignment, usually between 10-20 Kb apart, while other ISs are, for  
235 the most part, found at a fixed position around *bla*<sub>NDM</sub>. This indicates increased activity and multiple independent  
236 acquisitions of IS26. As expected, the transposons we identify are found on various plasmid backbones



237 (Supplementary Figure 8C). However, some trends can be identified in the distribution of associated bacterial  
238 genera and geographic region of sampling (Supplementary Figure 8A and B). In particular, Tn3000 is almost  
239 exclusively found in *Klebsiella* species and Tn125 predominantly in *Acinetobacter* and *Klebsiella*, while IS26 are  
240 found in *Escherichia* and *Klebsiella*. In spite of these elements being present across the globe, some geographic  
241 structure is apparent. For example, IS26 appears to dominate in East Asia while Tn3000 tends to occur in South  
242 Asia. Overall, the distributions of various structural variants and transposons with respect to plasmid replicon  
243 types and bacterial hosts suggest that most rearrangements in the *bla*<sub>N<sub>DM</sub></sub> flanking regions happened within  
244 *Escherichia* and *Klebsiella* species where IS26, Tn125 and Tn3000 are the main contributors to *bla*<sub>N<sub>DM</sub></sub> mobility.

245

## 246 Mutations accumulated in *bla*<sub>N<sub>DM</sub></sub> transposons provide only weak evolutionary 247 signal

248 To further investigate the dynamics of spread of the *bla*<sub>N<sub>DM</sub></sub> gene, regression analyses and Bayesian molecular tip-  
249 dating (implemented in BEAST2 v2.6.0) (R. Bouckaert et al., 2019) were performed on full alignments of Tn125  
250 (45 contigs) and Tn3000 (29 contigs) (Supplementary Figure 9). SNPs within each alignment were identified  
251 using a consensus sequence approach (see Methods). Few SNPs are observed in the alignments of Tn125 (56  
252 SNPs) and Tn3000 (14) (Supplementary Figure 9A and B). In fact, a general observation was that relatively few  
253 SNPs are found in alignments of any stretch of homologous sequence flanking *bla*<sub>N<sub>DM</sub></sub> relative to the number of  
254 structural variants. For instance, only 80 SNPs are present in the 2,570 bp alignment of 1,711 contigs harbouring  
255 *bla*<sub>N<sub>DM</sub></sub>, *ble*, *trpF*, and *dsbD* genes, while more than 50 different structural variations are found over the same  
256 distance downstream of the *bla*<sub>N<sub>DM</sub></sub> start codon. Going downstream, the number of structural variants increases  
257 while the number of newly accumulating SNPs plateaus, as fewer samples are available and the genetic  
258 background diversifies.

259 This restricted genetic diversity of the two transposon alignments results in only a weak temporal signal (see  
260 Methods and Supplementary Figure 9A and B). While results should therefore be interpreted with appropriate  
261 caution, we proceeded with Bayesian molecular tip-dating analyses to assess the relative timing of transposition  
262 events involving Tn125 and Tn3000 (see Methods). All models converged well, though we note that both marginal  
263 distributions of the most common recent ancestor (tMRCA) of Tn125 and Tn3000 (Supplementary Figure 9C and  
264 D) overlap with the marginal distributions of the corresponding model priors (i.e., BEAST2 runs without SNP  
265 data provided) (Supplementary Figure 9D) which is a likely consequence of the lack of genetic diversity.  
266 Nevertheless, the tMRCA estimates of Tn125 and Tn3000 shift from the expectation under the priors. In particular,  
267 the Tn3000 marginal distribution points to a later date indicating that the tMRCA of Tn3000 carrying *bla*<sub>N<sub>DM</sub></sub> gene  
268 emerged after mid-2008, but still before the earliest sampling date at the end of 2011 (Supplementary Figure 9C).  
269 In contrast, the marginal distribution of the Tn125 tMRCA shifts to an earlier date, suggesting this transposon  
270 mobilized *bla*<sub>N<sub>DM</sub></sub> before 2009 and after 2004. This tMRCA distribution also includes the dates of the earliest  
271 reported Tn125-*bla*<sub>N<sub>DM</sub></sub>-positive isolates from 2005 (Jones et al., 2014) which gives some credibility to these  
272 results.

273 The indications from molecular tip-dating fall into a wider narrative where *bla<sub>NDM</sub>* spread was initially driven by  
274 *Tn125* mobilization before subsequent transposition by *Tn3000*, and others. However, the sparsity of SNPs within  
275 the alignments, the weak temporal signal and the abundance of structural variants, plasmid backbones, transposons  
276 and ISs argue in favour of genetic recombination, rather than *de novo* mutation, as the dominant mechanism  
277 driving evolutionary change in the genetic region flanking *bla<sub>NDM</sub>* gene.

278

## 279 Correlates with the global dissemination of *bla<sub>NDM</sub>*

280 The earliest samples in our dataset span the years 2007 to 2010 and comprise 31 *bla<sub>NDM</sub>*-positive genomes already  
281 encompassing nine bacterial species, 13 countries, and three continents (23 confirmed clinical samples and 8 of  
282 unknown origin from Asia, North America and Europe). Even though the exact time of emergence remains an  
283 open question, such a wide host and geographic distribution, even in the earliest available samples, illustrates the  
284 extraordinarily high mobility of *bla<sub>NDM</sub>*. To track the spread of *bla<sub>NDM</sub>* we estimated diversity over time for several  
285 categorizations of *bla<sub>NDM</sub>*-positive samples (Supplementary Figure 11, see Methods). In particular, for each year,  
286 the diversity was estimated among samples' country of collection, associated bacterial genera, replicon types (i.e.,  
287 plasmid backbones), SNP counts within 5000 bp alignment, and structural variants at positions 3000 bp and 5000  
288 bp downstream of the *bla<sub>NDM</sub>* gene. Shannon entropy was used as a measure of diversity and bootstrapping  
289 implemented to provide confidence intervals around the entropy estimates. A strong sampling bias is present  
290 among isolates from the same NCBI BioProject (Supplementary Figure 10). To account for this, we weighted  
291 contigs during bootstrapping based on their BioProject affiliation (see Methods).

292 The change in diversity of the countries associated to *bla<sub>NDM</sub>*-positive isolates was used to approximate the broad  
293 patterns of global dissemination of NDM resistance (Supplementary Figure 11A). The diversity of sampling  
294 countries through time plateaued between 2013-2015. In light of the earliest reports of NDM-positive samples in  
295 2005, this indicates that it took eight to eleven years for NDM resistance to spread globally and is consistent with  
296 our estimates based on phylogenetic tip-dating (Supplementary Figure 9C). Furthermore, the change in the  
297 diversity of countries associated to *bla<sub>NDM</sub>*-positive genomes was found to be positively correlated with all other  
298 considered categories (Supplementary Figure 12) suggesting it holds information which can be leveraged to  
299 reconstruct dissemination trends. The weakest correlation with the widest confidence interval was found between  
300 the number of SNPs in the alignment and the diversity of countries of sample origin ( $\rho = 0.407$  [0.119-0.753]),  
301 followed by the bacterial genera ( $\rho = 0.5$  [0.217-0.7]), then structural variants at 3000bp downstream of *bla<sub>NDM</sub>*  
302 ( $\rho = 0.533$  [0.217-0.717], and 5000bp downstream ( $\rho = 0.683$  [0.433-0.85]). Despite the overlap of confidence  
303 intervals, this ordering again highlights the importance of genetic rearrangements and transposition in the  
304 evolution of this genetic region.

305 The strongest correlation was found between the diversity of countries with NDM-positive isolates and the  
306 replicon types of associated plasmid backbones ( $\rho = 0.7$  [0.467-0.883]) supporting a strong dependence between  
307 the two (Supplementary Figure 12B). To further investigate this relationship, we assessed the correlation between  
308 genetic and geographical distance between pairs of contigs as a function of the distance downstream of *bla<sub>NDM</sub>*  
309 gene (Figure 4, see Methods). Starting from *bla<sub>NDM</sub>* and moving downstream, we gradually extended the region

310 over which genetic distances were estimated. At each step, we estimated the correlation between genetic and  
311 geographic distance.

312 Considering all contig sequences, a gradual increase in correlation between genetic and geographic distance was  
313 observed as more of the sequence downstream of *bla*<sub>NDM</sub> was included (Figure 4A). The same trend is observed  
314 in an isolated case of “broad-range” IncF plasmids which have a wide geographical distribution (Figure 4B,  
315 Supplementary Figure 2). However, no significant or sufficiently long consecutive correlations were found among  
316 IncX3 and IncN plasmids (Supplementary Figure 13) likely due to the lack of longer plasmid sequences and more  
317 restricted mean geographic distance between pairs of plasmids; both replicon types are mostly found in China and  
318 India respectively (Supplementary Figure 2).

319 Nevertheless, considering *bla*<sub>NDM</sub> is predominantly carried by plasmids (Wu et al., 2019), the trend identified in  
320 Figure 4 suggests that plasmids carrying *bla*<sub>NDM</sub> are geographically structured. Gene dissemination is a  
321 fundamentally spatial process. Despite being theoretically mobile, in practice most plasmids may be both strongly  
322 host-constrained (Acman et al., 2020) and associated with particular locations or environmental niches (Shaw et  
323 al., 2020). All in all, this could be hinting at the existence of plasmid niches: settings to which particular plasmids  
324 are more adapted.

## 325 Discussion

326 Increasing levels of antimicrobial resistance in bacterial pathogens pose a major global health challenge, with  
327 resistance to carbapenems a particularly concerning example. Understanding the main mechanisms by which  
328 antibiotic resistance elements are disseminated is fundamental to our understanding of the spread of AMR, and  
329 new methods are required to fully reconstruct the forces underlying the dynamic mobilome common to many  
330 resistance elements. Here, we have compiled a global dataset of 2,148 bacterial genomes carrying *bla*<sub>NDM</sub>,  
331 including 112 new hybrid assemblies from Chinese hospitals, to provide a comprehensive overview of the  
332 different genetic backgrounds harbouring this resistance element and to gain insight into its mobility. In order to  
333 do this, we developed a new alignment-based method to resolve the complex structural variations flanking this  
334 major antibiotic resistance element.

335 Our results, summarized in Figure 3, highlight the vast diversity of genetic backgrounds and plasmids harbouring  
336 *bla*<sub>NDM</sub> and the predisposition of this region for genetic reshuffling. Moreover, we detected a markedly low SNP  
337 prevalence and weak temporal signal, which points to the importance of genetic recombination and transposition  
338 in driving the evolution of this region. In addition, we identified 18 different putative transposons within our  
339 dataset, of which Tn125, Tn3000 and IS26 flanked pseudo-composite transposon are predominant and represent  
340 the major contributors to plasmid jumps of *bla*<sub>NDM</sub>. IS26 seems particularly promiscuous; it is often found inserted  
341 at various positions around *bla*<sub>NDM</sub> and with some indication of within-isolate activity. IS26 is known for its  
342 increased activity and rearrangement of plasmids in clinical isolates (S. He et al., 2015) and has been observed to  
343 drive within-plasmid heterogeneity even in a single *E. coli* isolate (D. D. He et al., 2019). Thus, it is a likely  
344 candidate driving *bla*<sub>NDM</sub> gene acquisition and extensive rearrangements found within *bla*<sub>NDM</sub> region.  
345 Furthermore, IS5 was often and uniquely found immediately upstream of *bla*<sub>NDM</sub> and its peculiar positioning could  
346 foreshadow its role in increased transcription of the gene (Schnetz & Rak, 1992). Little to no evidence was found  
347 for the involvement of integrons and RC transposition of ISCR elements in spreading of *bla*<sub>NDM</sub>. In fact, ISCR1  
348 alongside other ISs, was mainly found disrupting the *bla*<sub>NDM</sub> region.

349 By assessing the change in entropy of countries where *bla*<sub>NDM</sub>-positive isolates have been sequenced over time,  
350 we traced the patterns underlying the spread of NDM resistance. Our assessment of diversity suggests that,  
351 following a rapid dissemination, the spread of *bla*<sub>NDM</sub> may have reached a plateau between 2013-2015, with  
352 *bla*<sub>NDM</sub> reaching a global prevalence 8-11 years after 2005. Such a rapid spread has also been suggested for other  
353 significant mobile resistance genes: the *mcr-1* gene, mediating colistin resistance, is also estimated to have reached  
354 global prevalence within a decade (R. Wang, Van Dorp, et al., 2018). The extent to which this model of 'rapid  
355 spread' applies to other transposon-borne resistance elements remains to be determined.

356 We found a strong positive correlation between genetic distances between plasmid backbones bearing *bla*<sub>NDM</sub> and  
357 the geographic location in which they were sampled, suggesting the existence of a constraint on plasmid spread  
358 i.e. plasmid niches. We presume plasmid niches exist thanks to local evolutionary pressures for which particular  
359 plasmid backbones are optimized. Country boundaries limiting population movement, region-specific outbursts  
360 of antibiotic usage and narrow host range of the majority of bacterial plasmids (Acman et al., 2020) all likely  
361 contribute to a restricted geographical range. Thus, an introduction of another plasmid into a foreign plasmid niche

362 may lead to plasmid loss or fast adaptation by, for instance, acquisition of resistance and other accessory elements.  
363 This hypothetical scenario also provides an opportunity for resistance to spread by transposition or recombination,  
364 by which a new resistance gene is able to enter another plasmid niche. In the case of *bla<sub>NDM</sub>*, this would also imply  
365 that after the initial introduction of *bla<sub>NDM</sub>* to a geographic region, dissemination and persistence of the gene could  
366 proceed idiosyncratically - selection for carbapenem resistance being just one of many selective pressures acting  
367 on plasmid diversity.

368 The importance of transposon movement has been previously demonstrated by our work on plasmid networks  
369 (Acman et al., 2020), as well as several papers promoting a Russian-doll model of resistance mobility (Sheppard  
370 et al., 2016; R. Wang, Van Dorp, et al., 2018). In light of our results, we suggest a conceptual framework of  
371 resistance gene dissemination where plasmid mobility is for the most part restricted. Although plasmids can  
372 facilitate rapid spread within species and geographical regions, the momentum of resistance dissemination is  
373 primarily reliant on between-plasmid transposon jumps and genetic recombination.

## 374 Methods

375

### 376 Compiling the dataset of NDM sequences

377 We compiled a global dataset of 2,148 bacterial genomes carrying the *bla<sub>NDM</sub>* gene from several publicly available  
378 databases. The vast majority of bacterial isolates were collected from patients (1,501), while 308 are of animal  
379 origin (184 from chickens, 51 from other birds and 47 from flies), 244 are of an unknown origin, and 95 are  
380 environmental samples (of which 36 are isolated from hospital environments). 1239 and 275 fully assembled  
381 genomes were downloaded from NCBI Reference Sequence Database (RefSeq; accessed on 23<sup>rd</sup> of May 2019)  
382 (O’Leary et al., 2016; Pruitt et al., 2007) and Enterobase (Zhou et al., 2020) respectively. The Enterobase  
383 repository was screened using BlastFrost (v1.0.0) (Luhmann et al., 2020) allowing for one mismatch. In addition,  
384 we used the Bitsliced Genomic Signature Index (BIGSI) tool (Bradley et al., 2019) to identify all Sequence Read  
385 Archive (SRA) unassembled reads which carry the *bla<sub>NDM</sub>* gene. At the time of writing, a publicly available BIGSI  
386 demo did not include sequencing datasets from after December 2016. Therefore, we manually indexed and  
387 screened an additional 355,375 SRA bacterial sequencing datasets starting from January 2017 to January 2019.  
388 We required the presence of 95% of *bla<sub>NDM-1</sub>* *k*-mers to identify NDM-positive samples from raw SRA reads. This  
389 led to the inclusion of 522 isolates from reads downloaded from the SRA repository. Furthermore, we generated  
390 112 new NDM-positive genomes using paired-end Illumina (Illumina HiSeq 2500) and PacBio (PacBio RS II)  
391 sequencing of isolates from 87 hospitalized patients across China and 25 livestock farms. The sequenced isolates  
392 were selected from two previous studies (Q. Wang et al., 2018; R. Wang, Liu, et al., 2018). The sequencing reads  
393 are available on the Short Read Archive (SRA) under accession number **XXXXXXXXX**. All reads were de novo  
394 assembled using Unicycler (v0.4.8) (Wick et al., 2017) using default parameters while also specifying hybrid  
395 mode for those isolates for which we had both Illumina short-read and PacBio long read sequencing data. Spades  
396 (v3.11.1) (Bankevich et al., 2012) was applied, without additional polishing, for cases where Unicycler assemblies  
397 failed to resolve. Sequencing datasets without associated metadata on the date of sampling were not included in  
398 the analysis.

399 In total, 2,165 contigs carrying the *bla<sub>NDM</sub>* gene were identified using BLAST (v2.10.1+) (Camacho et al., 2009).  
400 The full metadata table of contigs containing *bla<sub>NDM</sub>* is available as Supplementary Data 1. The table includes  
401 sample accession numbers and information on host organism, collection date, sampling location, assembly status,  
402 and contig plasmid type and circularity. Sixteen contigs (C165, C964, GCA\_000764615, GCA\_000814145,  
403 GCA\_001860505, GCA\_002133365, GCA\_002870165, GCA\_003194305, GCA\_003368345, GCA\_003716765,  
404 GCA\_003860815, GCA\_003950255, GCA\_003991465, GCA\_004795525, GCA\_005155965, GCF\_004357815)  
405 were found to carry more than one copy of *bla<sub>NDM</sub>* and were not included in our analyses. Two assemblies  
406 (GCF\_004358085 and GCF\_004357805) had a single *bla<sub>NDM</sub>* gene split into two contigs; these four contigs were  
407 also excluded. Contigs GCA\_00386065, C184 and C141 were removed due to poor assembly quality. This  
408 filtering resulted in a dataset of 2,142 contigs (2,128 genomes) which were used in all subsequent analyses. Of  
409 these, six genomes were found to contain *bla<sub>NDM</sub>* on two contigs, each one harbouring a single copy of *bla<sub>NDM</sub>*.

410

## 411 Annotating NDM-positive contigs

412 Coding sequences (CDS) of all NDM-positive contigs were annotated using the Prokka (v1.12) (Seemann, 2014)  
413 and Roary (v3.12.0) (Page et al., 2015) pipelines run with default parameters. In addition, plasmid sequences were  
414 confirmed based on RefSeq annotation (i.e., contigs labelled “plasmid”), contig circularity reported by Unicycler,  
415 or by the presence of a plasmid replicon sequence (Orlek et al., 2017). To identify plasmid replicon types, the  
416 contigs were screened against the PlasmidFinder database (version 2020-02-25) (Carattoli et al., 2014) using  
417 BLAST (v2.10.1+) (Camacho et al., 2009) where only BLAST hits with a minimum coverage of 80% and  
418 percentage identity of >95% were retained. In cases where two or more replicon hits were found at overlapping  
419 positions on a contig, the one with the higher percentage identity was retained. All identified plasmid types are  
420 provided in Supplementary Data 1.

421

## 422 Resolving structural variants of NDM-positive contigs

423 Structural variations upstream and downstream of *bla<sub>NDM</sub>* were resolved using a novel alignment-based approach,  
424 as illustrated in Figure 2. First, contigs carrying *bla<sub>NDM</sub>* were reoriented such that *bla<sub>NDM</sub>* gene is on the positive-  
425 sense DNA strand (i.e., facing 5’ to 3’ direction). A discontinuous Mega BLAST (v2.10.1+) (Ma et al., 2002)  
426 search with default settings was applied against all pairs of retained contigs. This method was selected over the  
427 regular Mega BLAST implementation as it is comparably fast, but more permissive towards dissimilar sequences  
428 with frequent gaps and mismatches. BLAST hits including a complete *bla<sub>NDM</sub>* gene on both contigs were selected  
429 and cropped to either (i) the start of *bla<sub>NDM</sub>* gene and the downstream sequence or (ii) the end of the *bla<sub>NDM</sub>* gene  
430 and the upstream sequence depending on the analysis at hand: the downstream or the upstream analysis  
431 respectively. This trimming establishes *bla<sub>NDM</sub>* as an anchor and forces the algorithm to consider only the region  
432 upstream or downstream of the gene.

433 Next, the algorithm proceeds with a stepwise network analysis of BLAST hits. For this purpose, a ‘splitting  
434 threshold’ was introduced. Starting from zero, the threshold is gradually increased by 10 bp. At each step, BLAST  
435 hits with a length lower than the value given by the ‘splitting threshold’ are excluded. Then, a network is  
436 constructed from the remaining BLAST hits such that contigs sharing a BLAST hit are connected with an edge.  
437 The network is then broken down into components – groups of nodes (contigs) that share a common edge. It is  
438 expected that contigs within each component share a homologous region downstream (or upstream) of *bla<sub>NDM</sub>* at  
439 least of the length given by the threshold. It is therefore not possible for a single contig to be assigned to multiple  
440 components. Components of size <5 bp are labelled as ‘Other Structural Variants’ and are not considered in further  
441 analyses. Also, contigs that are shorter than the defined ‘splitting threshold’ and share no edge with any other  
442 contig are considered as ‘cutting short’.

443 By tracking the splitting of the network as the ‘splitting threshold’ is increased, one can determine clusters of  
444 homologous contigs at any given position downstream or upstream from the anchor gene (here *bla<sub>NDM</sub>*), as well  
445 as the homology breakpoint. The precision of the algorithm is directly influenced by the step size which is, in this  
446 case, 10 bp and the alignment algorithm, in this case discontinuous Mega BLAST. The described algorithm is  
447 available at **LINK**

448

## 449 Date randomization, linear regression analyses and molecular tip-dating.

450 The 45 complete *Tn125* and 29 complete *Tn3000* contigs harbouring *bla<sub>NDM</sub>* were sequentially aligned  
451 (--pileup flag) using Clustal Omega (v1.2.3) (Sievers et al., 2011) specifying *bla<sub>NDM-1</sub>* as a profile. The consensus  
452 sequence over the alignment was considered the closest match to a putative ancestral sequence and was hence  
453 used as a reference to identify SNPs against. This approach was motivated by the fact that: (i) there is no  
454 appropriate outgroup sequence available; (ii) the oldest contigs in the dataset can harbour non-ancestral SNPs;  
455 (iii) due to a short time span and relatively few mutations present, it is unlikely that any one non-ancestral SNP  
456 has become dominant in the population.

457 Date randomization and linear regression analyses considering the number of SNPs accumulated against the year  
458 of sample collection provide an estimate of the strength of the temporal signal in the alignment (Duchene et al.,  
459 2019; Rambaut et al., 2016; Rieux & Balloux, 2016). We weighted the linear regressions by the BioProject  
460 affiliation of the sequences in the alignments of the two transposons (Supplementary Figure 8A and 8B). This was  
461 done to control the strong sampling biases present among samples from the same NCBI BioProject, with contigs  
462 from the same BioProject tending to be genetically similar irrespective of the sampling year (Supplementary  
463 Figure 9). While both *Tn125* and *Tn3000* showed positive temporal signal (Supplementary Figure 8A and B),  
464 neither regression was significant ( $p=0.1279$  and  $p=0.1375$  respectively). The low sample size and the low genetic  
465 diversity in the two alignments may limit the statistical power to detect temporal signal. Date-randomization  
466 analysis also showed that the estimated evolutionary rate for both transposons fell within the distribution of slopes  
467 on randomized dates (Supplementary Figure 8A and 8B).

468 A further test of meaningful signal in the data is to consider the degree to which the dated alignment can drive the  
469 posterior distribution away from the priors specified in Bayesian dating frameworks. BEAST2 (v2.6.0) (R.  
470 Bouckaert et al., 2019) was run on both transposon alignments specifying a strict molecular clock rate with a  
471 model averaging prior on the substitution model (R. R. Bouckaert & Drummond, 2017) and a MCMC chain length  
472 of  $5 \times 10^8$  (Supplementary Data 2). The long MCMC chain length was chosen to ensure convergence. For both runs  
473 the Serial Birth-Death Skyline (BDSS) model was specified as the tree prior. The BDSS model is commonly used  
474 for viral epidemics (Stadler et al., 2013) which share many parallels with AMR outbreaks. Similar to other birth-  
475 death models, the BDSS prior consists of three parameters: a rate of transmission (an estimate transposon/plasmid  
476 mobility), recovery (an estimate of transposon fossilization or plasmid loss), and sampling rate. Also, unlike  
477 coalescent models, BDSS does not attempt to estimate population sizes, which have limited applicability to dating  
478 small genetic regions and mobile elements. We evaluated the prior and posterior distributions across variables  
479 after discarding the first 20% of burn-in and after ensuring model convergence (an effective sample size >200).

480

## 481 Estimating Shannon entropy among NDM-positive contigs

482 We estimated Shannon entropy ('diversity') for several categorizations of *bla<sub>NDM</sub>*-containing contigs: country of  
483 sampling, bacterial host genera, replicon type, SNP count within a 5000 bp alignment, and structural variants at  
484 positions 3000 bp and 5000 bp downstream of the *bla<sub>NDM</sub>* gene. The 5000 bp alignment consisted of 654 contigs



485 harbouring *bla<sub>NDM</sub>*, *ble*, *trpF*, *dsbD*, *cutA*, *groS* and *groL* genes. To estimate entropy, we used a weighted  
486 bootstrapping approach (1000 iterations) with the probability of pooling any one sample inversely proportional to  
487 the number of samples contained in the corresponding BioProject. At each iteration, entropy was estimated for a  
488 sampled set of contigs ( $X$ ) classified into  $n$  unique categories according to the following formula:

$$489 \quad H(X) = -\sum_{i=1}^n P(x_i) \log P(x_i),$$

490 where probability  $P(x_i)$  of any sample belonging to any particular category  $x_i$  (e.g., country or replicon type) is  
491 approximated using the category's frequency. Accordingly, higher entropy values indicate an abundance of  
492 equally likely categories, while lower entropy indicates a limited number of categories.

493

## 494 Estimating geographical and genetic distance between contigs

495 Geographical distance between pairs of selected contigs was determined using the *geodist* (Padgham & Sumner,  
496 2020) R package and reported sampling coordinates or centroids of countries of collection if the former was not  
497 available. The exact Jaccard distance (JD) was used as a measure of the genetic distance. It was calculated using  
498 the tool Bindash (Zhao, 2019) with  $k$ -mer size equal to 21 bp. The JD is defined as the fraction of total  $k$ -mers not  
499 shared between two contigs. For instance, JD=1 denotes no  $k$ -mers are shared. The two distance matrices (genetic  
500 and geographic) were assessed using the *mantel* function from *vegan* package in R (Oksanen et al., 2019). To  
501 account for the sampling bias, pairs of contigs belonging to the same BioProject were not considered while  
502 estimating the Spearman correlation and performing the Mantel test between geographic and genetic distance.

## 503 Acknowledgements

504 M.A. was supported by a Ph.D. scholarship from University College London. H.W. is supported by National  
505 Natural Science Foundation of China (81625014). L.v.D., H.W. and F.B. acknowledge financial support from the  
506 Newton Fund UK-China NSFC initiative (MRC Grant MR/P007597/1 and 81661138006). L.v.D. and F.B. are  
507 supported from a Wellcome Institutional Strategic Support Fund (ISSF3) – AI in Healthcare (19RX03). F.B.  
508 additionally acknowledges support from the BBSRC GCRF scheme and the National Institute for Health Research  
509 University College London Hospitals Biomedical Research Centre. L.v.D is supported by a UCL Excellence  
510 Fellowship. M.A., L.v.D and F.B. acknowledge UCL Biosciences Big Data equipment grant from BBSRC  
511 (BB/R01356X/1). L.P.S. acknowledges funding from the Antimicrobial Resistance Cross-council Initiative  
512 supported by the seven UK research councils (NE/N019989/1). The funders had no role in study design, data  
513 collection, interpretation of results, or the decision to submit the work for publication. Lastly, M.A. would like to  
514 thank Nicola de Maio for informal discussions which led to the idea for the algorithm used to track structural  
515 variants.

## 516 Competing interests

517 The authors declare no financial or non-financial competing interests.

## 518 Contributions

519 M.A., F.B., L.v.D. and H.W. conceived the project and designed the experiments. M.A., L.v.D., L.P.S., and N.L.  
520 collected data from online repositories. R.W., Y.Y., Q.W., S.S, and H.C sequenced samples from Chinese  
521 hospitals. M.A., L.v.D, and R.W. *de novo* assembled all the genomes. M.A. performed all the analyses under the  
522 guidance of L.v.D and F.B. M.A., L.v.D. and F.B. take responsibility for the accuracy and availability of the  
523 results. M.A. wrote the paper with contributions from L.v.D. and F.B. All authors read and commented on  
524 successive drafts and all approved the content of the final version.

## 525 References

526

527 Acman, M., van Dorp, L., Santini, J. M., & Balloux, F. (2020). Large-scale network analysis captures biological  
528 features of bacterial plasmids. *Nature Communications*, *11*(1), 1–11. [https://doi.org/10.1038/s41467-020-](https://doi.org/10.1038/s41467-020-16282-w)  
529 [16282-w](https://doi.org/10.1038/s41467-020-16282-w)

530 Bankevich, A., Nurk, S., Antipov, D., Gurevich, A. A., Dvorkin, M., Kulikov, A. S., Lesin, V. M., Nikolenko,  
531 S. I., Pham, S., Prjibelski, A. D., Pyshkin, A. V., Sirotkin, A. V., Vyahhi, N., Tesler, G., Alekseyev, M. A.,  
532 & Pevzner, P. A. (2012). SPAdes: a new genome assembly algorithm and its applications to single-cell  
533 sequencing. *Journal of Computational Biology: A Journal of Computational Molecular Cell Biology*,  
534 *19*(5), 455–477. <https://doi.org/10.1089/cmb.2012.0021>

535 Baraniak, A., Izdebski, R., Fiett, J., Gawryszewska, I., Bojarska, K., Herda, M., Literacka, E., Żabicka, D.,  
536 Tomczak, H., Pewińska, N., Szarata, M., Ozorowski, T., Milner, A., Hryniewicz, W., & Gniadkowski, M.  
537 (2016). NDM-producing Enterobacteriaceae in Poland, 2012–14: inter-regional outbreak of *Klebsiella*  
538 *pneumoniae* ST11 and sporadic cases. *Journal of Antimicrobial Chemotherapy*, *71*(1), 85–91.  
539 <https://doi.org/10.1093/jac/dkv282>

540 Basu, S. (2020). Variants of the New Delhi metallo-β-lactamase: New kids on the block. In *Future*  
541 *Microbiology* (Vol. 15, Issue 7, pp. 465–467). Future Medicine Ltd. [https://doi.org/10.2217/fmb-2020-](https://doi.org/10.2217/fmb-2020-0035)  
542 [0035](https://doi.org/10.2217/fmb-2020-0035)

543 Bonnin, R. A., Poirel, L., Naas, T., Pirs, M., Seme, K., Schrenzel, J., & Nordmann, P. (2012). Dissemination of  
544 New Delhi metallo-β-lactamase-1-producing *Acinetobacter baumannii* in Europe. *Clinical Microbiology*  
545 *and Infection*, *18*(9), E362–E365. <https://doi.org/10.1111/j.1469-0691.2012.03928.x>

546 Bouckaert, R. R., & Drummond, A. J. (2017). bModelTest: Bayesian phylogenetic site model averaging and  
547 model comparison. *BMC Evolutionary Biology*, *17*(1), 1–11. <https://doi.org/10.1186/s12862-017-0890-6>

548 Bouckaert, R., Vaughan, T. G., Barido-Sottani, J., Duchêne, S., Fourment, M., Gavryushkina, A., Heled, J.,  
549 Jones, G., Kühnert, D., De Maio, N., Matschiner, M., Mendes, F. K., Müller, N. F., Ogilvie, H. A., Du  
550 Plessis, L., Popinga, A., Rambaut, A., Rasmussen, D., Siveroni, I., ... Drummond, A. J. (2019). BEAST  
551 2.5: An advanced software platform for Bayesian evolutionary analysis. *PLoS Computational Biology*,  
552 *15*(4), e1006650. <https://doi.org/10.1371/journal.pcbi.1006650>

553 Bradley, P., den Bakker, H. C., Rocha, E. P. C., McVean, G., & Iqbal, Z. (2019). Ultrafast search of all  
554 deposited bacterial and viral genomic data. *Nature Biotechnology*, *37*(2), 152–159.  
555 <https://doi.org/10.1038/s41587-018-0010-1>

556 Camacho, C., Coulouris, G., Avagyan, V., Ma, N., Papadopoulos, J., Bealer, K., & Madden, T. L. (2009).  
557 BLAST+: architecture and applications. *BMC Bioinformatics*, *10*(1), 421. [https://doi.org/10.1186/1471-](https://doi.org/10.1186/1471-2105-10-421)  
558 [2105-10-421](https://doi.org/10.1186/1471-2105-10-421)

559 Campos, J. C., da Silva, M. J. F., dos Santos, P. R. N., Barros, E. M., Pereira, M. de O., Seco, B. M. S.,  
560 Magagnin, C. M., Leiroz, L. K., de Oliveira, T. G. M., de Faria-Júnior, C., Cerdeira, L. T., Barth, A. L.,  
561 Sampaio, S. C. F., Zavasecki, A. P., Poirel, L., & Sampaio, J. L. M. (2015). Characterization of Tn3000, a  
562 Transposon Responsible for blaNDM-1 Dissemination among Enterobacteriaceae in Brazil, Nepal,  
563 Morocco, and India. *Antimicrobial Agents and Chemotherapy*, *59*(12), 7387–7395.  
564 <https://doi.org/10.1128/AAC.01458-15>

- 565 Carattoli, A., Zankari, E., García-fernández, A., Larsen, V., Lund, O., Villa, L., Aarestrup, M., & Hasman, H.  
566 (2014). *In Silico Detection and Typing of Plasmids using PlasmidFinder and Plasmid Multilocus*  
567 *Sequence Typing*. 58(7), 3895–3903. <https://doi.org/10.1128/AAC.02412-14>
- 568 Castanheira, M., Deshpande, L. M., Mathai, D., Bell, J. M., Jones, R. N., & Mendes, R. E. (2011). Early  
569 dissemination of NDM-1- and OXA-181-producing Enterobacteriaceae in Indian hospitals: Report from  
570 the SENTRY Antimicrobial Surveillance Program, 2006-2007. *Antimicrobial Agents and Chemotherapy*,  
571 55(3), 1274–1278. <https://doi.org/10.1128/AAC.01497-10>
- 572 Chatterjee, S., Mondal, A., Mitra, S., & Basu, S. (2017). Acinetobacter baumannii transfers the blaNDM-1 gene  
573 via outer membrane vesicles. *Journal of Antimicrobial Chemotherapy*, 72(8), 2201–2207.  
574 <https://doi.org/10.1093/jac/dkx131>
- 575 Duchene, S., Lemey, P., Stadler, T., Ho, S. Y. W., Duchene, D. A., Dhanasekaran, V., & Baele, G. (2019).  
576 Bayesian Evaluation of Temporal Signal In Measurably Evolving Populations. *BioRxiv*.  
577 <https://doi.org/10.1101/810697>
- 578 González, L. J., Bahr, G., Nakashige, T. G., Nolan, E. M., Bonomo, R. A., & Vila, A. J. (2016). Membrane  
579 anchoring stabilizes and favors secretion of New Delhi metallo- $\beta$ -lactamase. *Nature Chemical Biology*,  
580 12(7), 516–522. <https://doi.org/10.1038/nchembio.2083>
- 581 Harmer, C. J., & Hall, R. M. (2019). An analysis of the IS6/IS26 family of insertion sequences: Is it a single  
582 family? *Microbial Genomics*, 5(9). <https://doi.org/10.1099/mgen.0.000291>
- 583 Harmer, C. J., Moran, R. A., & Hall, R. M. (2014). Movement of IS26-Associated antibiotic resistance genes  
584 occurs via a translocatable unit that includes a single IS26 and preferentially inserts adjacent to another  
585 IS26. *MBio*, 5(5). <https://doi.org/10.1128/mBio.01801-14>
- 586 Harmer, C. J., Pong, C. H., & Hall, R. M. (2020). Structures bounded by directly-oriented members of the IS26  
587 family are pseudo-compound transposons. In *Plasmid* (Vol. 111, p. 102530). Academic Press Inc.  
588 <https://doi.org/10.1016/j.plasmid.2020.102530>
- 589 He, D. D., Zhao, S. Y., Wu, H., Hu, G. Z., Zhao, J. F., Zong, Z. Y., & Pan, Y. S. (2019). Antimicrobial  
590 resistance-encoding plasmid clusters with heterogeneous MDR regions driven by IS26 in a single  
591 Escherichia coli isolate. *Journal of Antimicrobial Chemotherapy*, 74(6), 1511–1516.  
592 <https://doi.org/10.1093/jac/dkz044>
- 593 He, S., Hickman, A. B., Varani, A. M., Siguier, P., Chandler, M., Dekker, J. P., & Dyda, F. (2015). Insertion  
594 sequence IS26 reorganizes plasmids in clinically isolated multidrug-resistant bacteria by replicative  
595 transposition. *MBio*, 6(3), 1–14. <https://doi.org/10.1128/mBio.00762-15>
- 596 Huang, T. W., Chen, T. L., Chen, Y. T., Lauderdale, T. L., Liao, T. L., Lee, Y. T., Chen, C. P., Liu, Y. M., Lin,  
597 A. C., Chang, Y. H., Wu, K. M., Kirby, R., Lai, J. F., Tan, M. C., Siu, L. K., Chang, C. M., Fung, C. P., &  
598 Tsai, S. F. (2013). Copy Number Change of the NDM-1 Sequence in a Multidrug-Resistant Klebsiella  
599 pneumoniae Clinical Isolate. *PLoS ONE*, 8(4), 1–12. <https://doi.org/10.1371/journal.pone.0062774>
- 600 Ilyina, T. S. (2012). Mobile ISCR elements: Structure, functions, and role in emergence, increase, and spread of  
601 blocks of bacterial multiple antibiotic resistance genes. In *Molecular Genetics, Microbiology and Virology*  
602 (Vol. 27, Issue 4, pp. 135–146). Springer. <https://doi.org/10.3103/S0891416812040040>
- 603 Jones, L. S., Toleman, M. A., Weeks, J. L., Howe, R. A., Walsh, T. R., & Kumarasamy, K. K. (2014). Plasmid  
604 carriage of blaNDM-1 in clinical Acinetobacter baumannii isolates from India. *Antimicrobial Agents and*

- 605 *Chemotherapy*, 58(7), 4211–4213. <https://doi.org/10.1128/AAC.02500-14>
- 606 Kumarasamy, K. K., Toleman, M. A., Walsh, T. R., Bagaria, J., Butt, F., Balakrishnan, R., Chaudhary, U.,  
607 Doumith, M., Giske, C. G., Irfan, S., Krishnan, P., Kumar, A. V., Maharjan, S., Mushtaq, S., Noorie, T.,  
608 Paterson, D. L., Pearson, A., Perry, C., Pike, R., ... Woodford, N. (2010). Emergence of a new antibiotic  
609 resistance mechanism in India, Pakistan, and the UK: A molecular, biological, and epidemiological study.  
610 *The Lancet Infectious Diseases*, 10(9), 597–602. [https://doi.org/10.1016/S1473-3099\(10\)70143-2](https://doi.org/10.1016/S1473-3099(10)70143-2)
- 611 Luhmann, N., Holley, G., & Achtman, M. (2020). BlastFrost: Fast querying of 100,000s of bacterial genomes in  
612 Bifrost graphs. *BioRxiv*, 1–24. <https://doi.org/10.1101/2020.01.21.914168>
- 613 Lynch, T., Chen, L., Peirano, G., Gregson, D. B., Church, D. L., Conly, J., Kreiswirth, B. N., & Pitout, J. D.  
614 (2016). Molecular evolution of a klebsiella pneumoniae st278 isolate harboring blandm-7 and involved in  
615 nosocomial transmission. *Journal of Infectious Diseases*, 214(5), 798–806.  
616 <https://doi.org/10.1093/infdis/jiw240>
- 617 Ma, B., Tromp, J., & Li, M. (2002). PatternHunter: Faster and more sensitive homology search. *Bioinformatics*,  
618 18(3), 440–445. <https://doi.org/10.1093/bioinformatics/18.3.440>
- 619 O’Leary, N. A., Wright, M. W., Brister, J. R., Ciufu, S., Haddad, D., McVeigh, R., Rajput, B., Robbertse, B.,  
620 Smith-White, B., Ako-Adjei, D., Astashyn, A., Badretdin, A., Bao, Y., Blinkova, O., Brover, V.,  
621 Chetvernin, V., Choi, J., Cox, E., Ermolaeva, O., ... Pruitt, K. D. (2016). Reference sequence (RefSeq)  
622 database at NCBI: current status, taxonomic expansion, and functional annotation. *Nucleic Acids*  
623 *Research*, 44(D1), D733-45. <https://doi.org/10.1093/nar/gkv1189>
- 624 Oksanen, J., Blanchet, F. G., Friendly, M., Kindt, R., Legendre, P., McGlinn, D., Minchin, P. R., O’Hara, R. B.,  
625 Simpson, G. L., Solymos, P., Stevens, M. H. H., Szoecs, E., & Wagner, H. (2019). *vegan: Community*  
626 *Ecology Package* (R package version 2.5-6.). <https://cran.r-project.org/package=vegan>
- 627 Orlek, A., Stoesser, N., Anjum, M. F., Doumith, M., Ellington, M. J., Peto, T., Crook, D., Woodford, N., Sarah  
628 Walker, A., Phan, H., & Sheppard, A. E. (2017). Plasmid classification in an era of whole-genome  
629 sequencing: Application in studies of antibiotic resistance epidemiology. In *Frontiers in Microbiology*  
630 (Vol. 8, Issue FEB, pp. 1–10). <https://doi.org/10.3389/fmicb.2017.00182>
- 631 Padgham, M., & Sumner, M. D. (2020). *geodist: Fast, Dependency-Free Geodesic Distance Calculations*. (R  
632 package version 0.0.4). <https://cran.r-project.org/package=geodist>
- 633 Page, A. J., Cummins, C. A., Hunt, M., Wong, V. K., Reuter, S., Holden, M. T. G., Fookes, M., Falush, D.,  
634 Keane, J. A., & Parkhill, J. (2015). Roary: rapid large-scale prokaryote pan genome analysis.  
635 *Bioinformatics*, 31(22), 3691–3693. <https://doi.org/10.1093/bioinformatics/btv421>
- 636 Partridge, S. R., & Iredell, J. R. (2012). Genetic Contexts of bla NDM-1. In *Antimicrobial Agents and*  
637 *Chemotherapy* (Vol. 56, Issue 11, pp. 6065–6067). American Society for Microbiology (ASM).  
638 <https://doi.org/10.1128/AAC.00117-12>
- 639 Poirel, L., Bonnin, R. A., Boulanger, A., Schrenzel, J., Kaase, M., & Nordmann, P. (2012). Tn125-related  
640 acquisition of blaNDM-like genes in Acinetobacter baumannii. *Antimicrobial Agents and Chemotherapy*,  
641 56(2), 1087–1089. <https://doi.org/10.1128/AAC.05620-11>
- 642 Poirel, L., Bonnin, R. A., & Nordmann, P. (2011). Analysis of the resistome of a multidrug-resistant NDM-1-  
643 producing Escherichia coli strain by high-throughput genome sequencing. *Antimicrobial Agents and*  
644 *Chemotherapy*, 55(9), 4224–4229. <https://doi.org/10.1128/AAC.00165-11>

- 645 Poirel, L., Dortet, L., Bernabeu, S., & Nordmann, P. (2011). Genetic Features of bla NDM-1-Positive  
646 Enterobacteriaceae. *ANTIMICROBIAL AGENTS AND CHEMOTHERAPY*, 55(11), 5403–5407.  
647 <https://doi.org/10.1128/AAC.00585-11>
- 648 Pruitt, K. D., Tatusova, T., & Maglott, D. R. (2007). NCBI reference sequences (RefSeq): A curated non-  
649 redundant sequence database of genomes, transcripts and proteins. *Nucleic Acids Research*, 35(SUPPL.  
650 1), D61–D65. <https://doi.org/10.1093/nar/gkl842>
- 651 Rahman, M., Prasad, K. N., Gupta, S., Singh, S., Singh, A., Pathak, A., Gupta, K. K., Ahmad, S., & Gonzalez-  
652 Zorn, B. (2018). Prevalence and Molecular Characterization of New Delhi Metallo-Beta-Lactamases in  
653 Multidrug-Resistant *Pseudomonas aeruginosa* and *Acinetobacter baumannii* from India. *Microbial Drug*  
654 *Resistance*, 24(6), 792–798. <https://doi.org/10.1089/mdr.2017.0078>
- 655 Rambaut, A., Lam, T. T., Carvalho, L. M., & Pybus, O. G. (2016). Exploring the temporal structure of  
656 heterochronous sequences using TempEst (formerly Path-O-Gen). *Virus Evolution*, 2(1), 1–7.  
657 <https://doi.org/10.1093/ve/vew007>
- 658 Rieux, A., & Balloux, F. (2016). Inferences from tip-calibrated phylogenies: A review and a practical guide.  
659 *Molecular Ecology*, 25(9), 1911–1924. <https://doi.org/10.1111/mec.13586>
- 660 Roca, I., Mosqueda, N., Altun, B., Espinal, P., Akova, M., & Vila, J. (2014). Molecular characterization of  
661 NDM-1-producing *Acinetobacter pittii* isolated from Turkey in 2006. *Journal of Antimicrobial*  
662 *Chemotherapy*, 69(12), 3437–3438. <https://doi.org/10.1093/jac/dku306>
- 663 Sahl, J. W., Del Franco, M., Pournaras, S., Colman, R. E., Karah, N., Dijkshoorn, L., & Zarrilli, R. (2015).  
664 Phylogenetic and genomic diversity in isolates from the globally distributed *Acinetobacter baumannii*  
665 ST25 lineage. *Scientific Reports*, 5. <https://doi.org/10.1038/srep15188>
- 666 Schnetz, K., & Rak, B. (1992). IS5: A mobile enhancer of transcription in *Escherichia coli*. *Proceedings of the*  
667 *National Academy of Sciences of the United States of America*, 89(4), 1244–1248.  
668 <https://doi.org/10.1073/pnas.89.4.1244>
- 669 Seemann, T. (2014). Prokka: rapid prokaryotic genome annotation. *Bioinformatics*, 30(14), 2068–2069.  
670 <https://doi.org/10.1093/bioinformatics/btu153>
- 671 Sekizuka, T., Matsui, M., Yamane, K., Takeuchi, F., Ohnishi, M., Hishinuma, A., Arakawa, Y., & Kuroda, M.  
672 (2011). Complete Sequencing of the blaNDM-1-Positive IncA/C Plasmid from *Escherichia coli* ST38  
673 Isolate Suggests a Possible Origin from Plant Pathogens. *PLoS ONE*, 6(9), e25334.  
674 <https://doi.org/10.1371/journal.pone.0025334>
- 675 Shaw, L., Chau, K., Kavanagh, J., AbuOun, M., Stubberfield, E., Gweon, H. S., Barker, L., Rodger, G., Bowes,  
676 M., Hubbard, A., Pickford, H., Swann, J., Gilson, D., Smith, R., Hoosdally, S., Sebra, R., Brett, H., Peto,  
677 T., Bailey, M., ... Stoesser, N. (2020). *Niche and local geography shape the pangenome of wastewater-*  
678 *and livestock-associated Enterobacteriaceae*. 1–23. <https://doi.org/10.1101/2020.07.23.215756>
- 679 Sheppard, A. E., Stoesser, N., Wilson, D. J., Sebra, R., Kasarskis, A., Anson, L. W., Giess, A., Pankhurst, L. J.,  
680 Vaughan, A., Grim, C. J., Cox, H. L., Yeh, A. J., Group, the M. M. M. (MMM) I., Sifri, C. D., Walker, A.  
681 S., Peto, T. E., Crook, D. W., & Mathers, A. J. (2016). Nested Russian Doll-Like Genetic Mobility Drives  
682 Rapid Dissemination of the Carbapenem Resistance Gene blaKPC. *Antimicrobial Agents and*  
683 *Chemotherapy*, 60(6), 3767–3778. <https://doi.org/10.1128/AAC.00464-16>
- 684 Sievers, F., Wilm, A., Dineen, D., Gibson, T. J., Karplus, K., Li, W., Lopez, R., McWilliam, H., Remmert, M.,

- 685 Söding, J., Thompson, J. D., & Higgins, D. G. (2011). Fast, scalable generation of high-quality protein  
686 multiple sequence alignments using Clustal Omega. *Molecular Systems Biology*, 7(1), 539.  
687 <https://doi.org/10.1038/msb.2011.75>
- 688 Sohn, J. Il, & Nam, J. W. (2018). The present and future of de novo whole-genome assembly. *Briefings in*  
689 *Bioinformatics*, 19(1), 23–40. <https://doi.org/10.1093/bib/bbw096>
- 690 Stadler, T., Kühnert, D., Bonhoeffer, S., & Drummond, A. J. (2013). Birth-death skyline plot reveals temporal  
691 changes of epidemic spread in HIV and hepatitis C virus (HCV). *Proceedings of the National Academy of*  
692 *Sciences of the United States of America*, 110(1), 228–233. <https://doi.org/10.1073/pnas.1207965110>
- 693 Struelens, M. J., Monnet, D. L., Magiorakos, A. P., Santos O'Connor, F., Giesecke, J., & the European NDM-  
694 Survey Participan, C. (2010). New Delhi metallo-beta-lactamase 1-producing Enterobacteriaceae:  
695 emergence and response in Europe. *Eurosurveillance*, 15(46), 19716.  
696 <https://doi.org/10.2807/es.e15.46.19716-en>
- 697 Toleman, M. A., Bennett, P. M., & Walsh, T. R. (2006). ISCR Elements: Novel Gene-Capturing Systems of the  
698 21st Century? *Microbiology and Molecular Biology Reviews*, 70(2), 296–316.  
699 <https://doi.org/10.1128/mmmbr.00048-05>
- 700 Toleman, M. A., Spencer, J., Jones, L., & Walsh, T. R. (2012). bla NDM-1 is a chimera likely constructed in  
701 *Acinetobacter baumannii*. *Antimicrobial Agents and Chemotherapy*, 56(5), 2773–2776.  
702 <https://doi.org/10.1128/AAC.06297-11>
- 703 Wailan, A. M., Sartor, A. L., Zowawi, H. M., Perry, J. D., Paterson, D. L., & Sidjabat, H. E. (2015). Genetic  
704 contexts of blaNDM-1 in patients carrying multiple NDM-producing strains. *Antimicrobial Agents and*  
705 *Chemotherapy*, 59(12), 7405–7410. <https://doi.org/10.1128/AAC.01319-15>
- 706 Wang, Q., Wang, X., Wang, J., Ouyang, P., Jin, C., Wang, R., Zhang, Y., Jin, L., Chen, H., Wang, Z., Zhang, F.,  
707 Cao, B., Xie, L., Liao, K., Gu, B., Yang, C., Liu, Z., Ma, X., Jin, L., ... Wang, H. (2018). Phenotypic and  
708 Genotypic Characterization of Carbapenem-resistant Enterobacteriaceae: Data from a Longitudinal Large-  
709 scale CRE Study in China (2012-2016). *Clinical Infectious Diseases*, 67(Suppl 2), S196–S205.  
710 <https://doi.org/10.1093/cid/ciy660>
- 711 Wang, R., Liu, Y., Zhang, Q., Jin, L., Wang, Q., Zhang, Y., Wang, X., Hu, M., Li, L., Qi, J., Luo, Y., & Wang,  
712 H. (2018). The prevalence of colistin resistance in *Escherichia coli* and *Klebsiella pneumoniae* isolated  
713 from food animals in China: coexistence of mcr-1 and blaNDM with low fitness cost. *International*  
714 *Journal of Antimicrobial Agents*, 51(5), 739–744. <https://doi.org/10.1016/j.ijantimicag.2018.01.023>
- 715 Wang, R., Van Dorp, L., Shaw, L. P., Bradley, P., Wang, Q., Wang, X., Jin, L., Zhang, Q., Liu, Y., Rieux, A.,  
716 Dorai-Schneiders, T., Weinert, L. A., Iqbal, Z., Didelot, X., Wang, H., & Balloux, F. (2018). The global  
717 distribution and spread of the mobilized colistin resistance gene mcr-1. *Nature Communications*, 9(1), 1–  
718 9. <https://doi.org/10.1038/s41467-018-03205-z>
- 719 Wick, R. R., Judd, L. M., Gorrie, C. L., & Holt, K. E. (2017). Unicycler: Resolving bacterial genome assemblies  
720 from short and long sequencing reads. *PLoS Computational Biology*, 13(6), 1–22.  
721 <https://doi.org/10.1371/journal.pcbi.1005595>
- 722 Wu, W., Feng, Y., Tang, G., Qiao, F., McNally, A., & Zong, Z. (2019). NDM metallo-β-lactamases and their  
723 bacterial producers in health care settings. In *Clinical Microbiology Reviews* (Vol. 32, Issue 2).  
724 <https://doi.org/10.1128/CMR.00115-18>

- 725 Yong, D., Toleman, M. A., Giske, C. G., Cho, H. S., Sundman, K., Lee, K., & Walsh, T. R. (2009).  
726 Characterization of a new metallo- $\beta$ -lactamase gene, bla NDM-1, and a novel erythromycin esterase gene  
727 carried on a unique genetic structure in *Klebsiella pneumoniae* sequence type 14 from India.  
728 *Antimicrobial Agents and Chemotherapy*, 53(12), 5046–5054. <https://doi.org/10.1128/AAC.00774-09>  
729 Zhao, X. (2019). BinDash, software for fast genome distance estimation on a typical personal laptop.  
730 *Bioinformatics*, 35(4), 671–673. <https://doi.org/10.1093/bioinformatics/bty651>  
731 Zhou, Z., Alikhan, N. F., Mohamed, K., Fan, Y., & Achtman, M. (2020). The EnteroBase user's guide, with  
732 case studies on *Salmonella* transmissions, *Yersinia pestis* phylogeny, and *Escherichia* core genomic  
733 diversity. *Genome Research*, 30(1), 138–152. <https://doi.org/10.1101/gr.251678.119>  
734



735 **Figures**

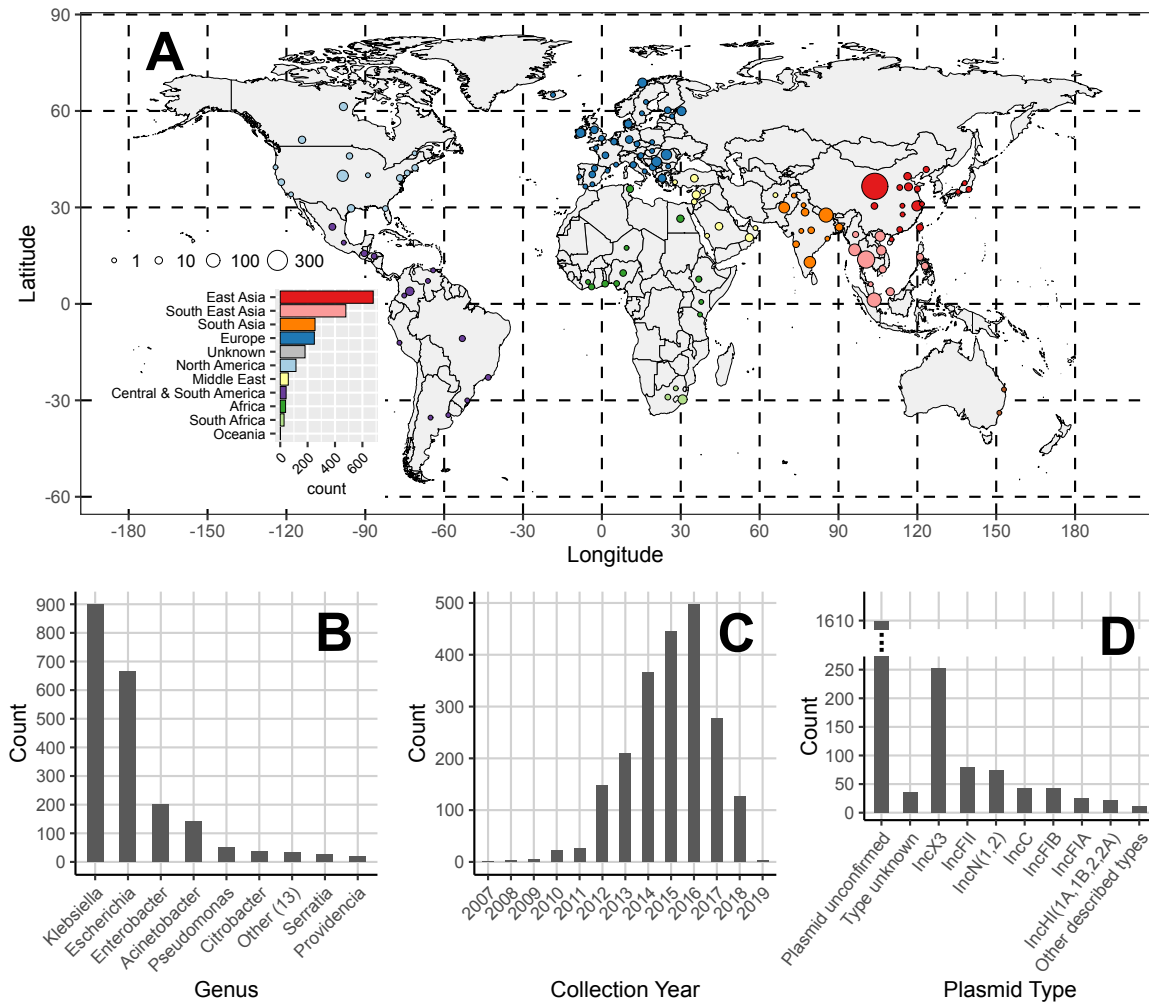

736

737 **Figure 1. Composition of the global dataset of 2,148 NDM-positive samples.** (A) Geographic  
 738 distribution of NDM-positive assemblies. Points are coloured by geographic region and their size reflects  
 739 the number of samples they encompass. (B) Distribution of host bacterial genera of NDM-positive  
 740 samples. (C) Distribution of sample collection years. (D) Identified plasmid types on contigs bearing the  
 741 NDM-resistance. All uncircularized contigs with unknown plasmid type were labelled ‘plasmid  
 742 unconfirmed’. On the other hand, all circularized contigs with an unknown plasmid type were still  
 743 considered plasmids but labelled ‘type unknown’.

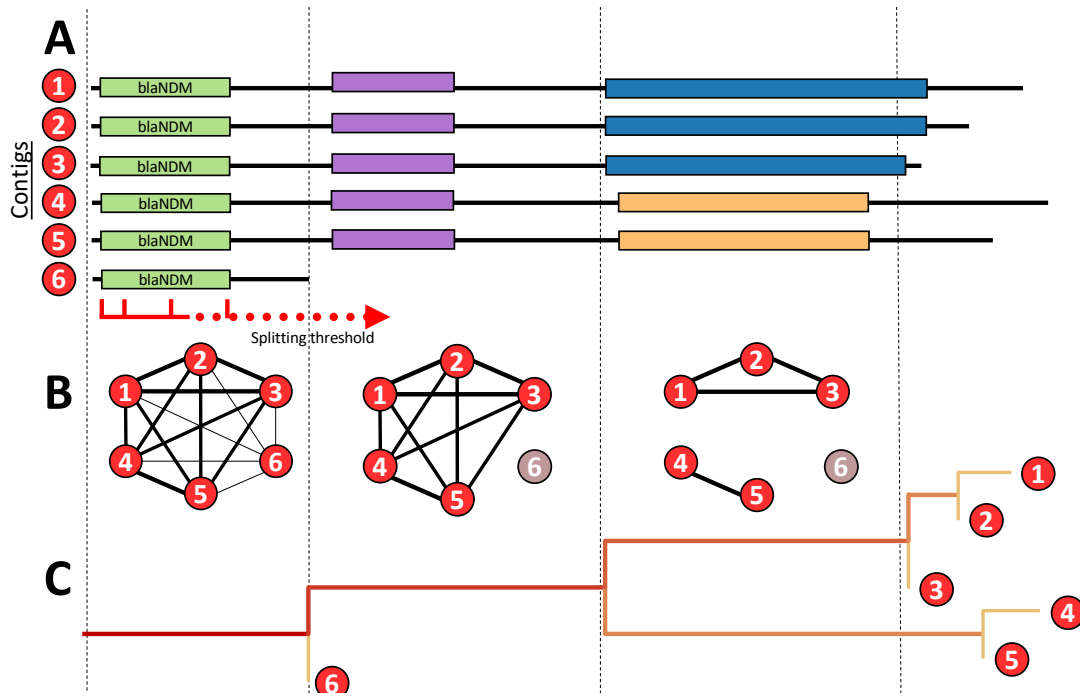

744

745 **Figure 2. Schematic representation of the tracking algorithm splitting structural variant**

746 **backgrounds upstream or downstream of *blaNDM* gene. (A)** A pairwise BLAST search is performed

747 on all NDM-positive contigs. Starting from *blaNDM* and continuing downstream or upstream, the

748 inspected region is gradually increased using the 'splitting threshold'. **(B)** At each step, a graph is

749 constructed connecting contigs (nodes) that share a BLAST hit with a minimum length as given by the

750 'splitting threshold'. Contigs which have the same structural variant at the certain position of the

751 threshold belong to the same graph component, while the short contigs are singled out. **(C)** The splitting

752 is visualized as a tree where branch lengths are scaled to match the position within the sequence, and

753 the thickness and the colour intensity of the branches correspond to the number of sequences carrying

754 the homology.

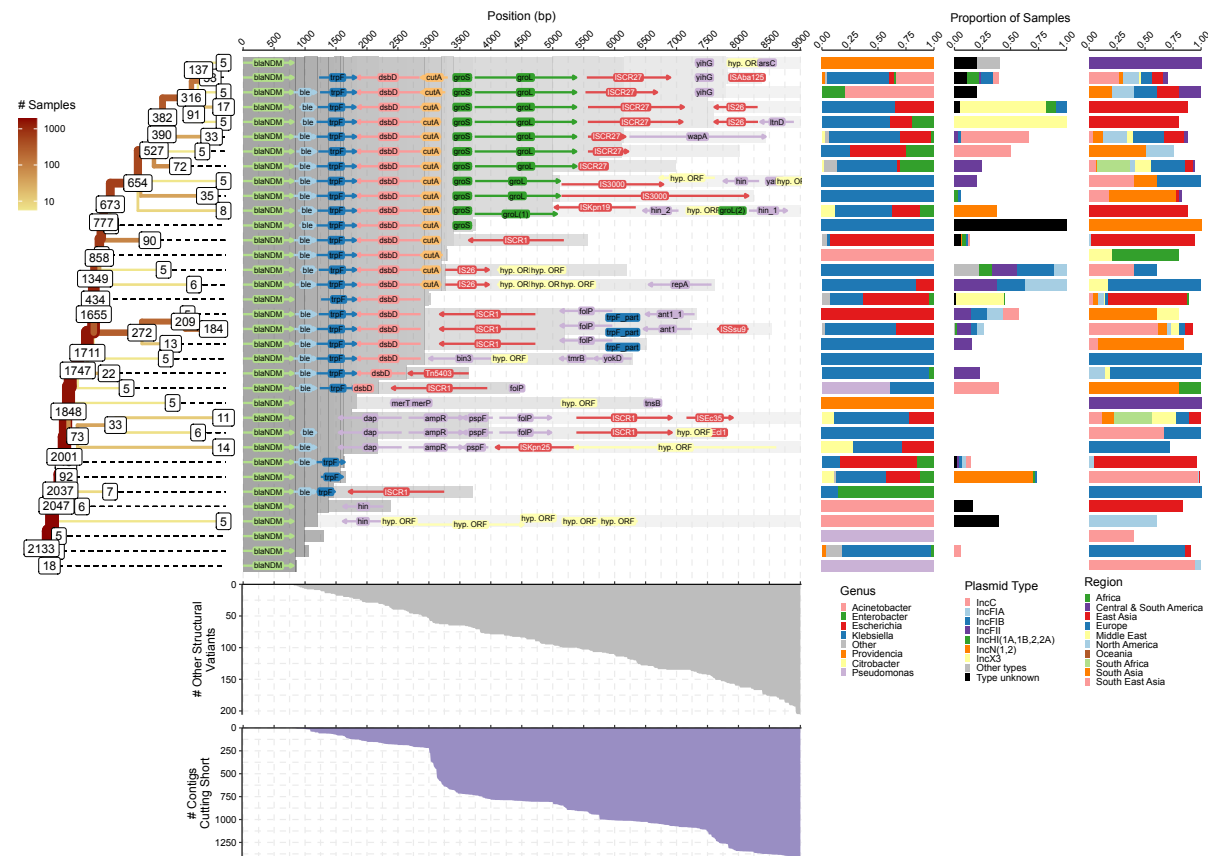

755

756 **Figure 3. Splitting of structural variants downstream of *bla*<sub>NDM</sub>.** The 'splitting' tree for the most

757 common (i.e.  $\geq 5$  contigs) structural variants is shown on the left-hand side. The labels on the nodes

758 indicate the number of contigs remaining on each branch. The other contigs either belong to other

759 structural variants or were removed due to being too short in length. The number of contigs cutting short

760 is indicated by the area chart at the bottom. Similarly, the number of contigs belonging to less common

761 structural variants is indicated by the upper area chart. The genome annotations of most common

762 structural variants are shown in the middle of the figure. The homologous regions are indicated by the

763 grey shading. Some of the structural variants and branches were intentionally cut short even though

764 their contigs were of sufficient size. This was done in order to prevent excessive bifurcation and to make

765 the tree easier to interpret. In particular, branches with percent change of contigs lost due to variation

766 and shortness above 10% were truncated. The distribution of genera, plasmid types and geographical

767 regions of samples that belong to each of the common structural variants is shown on the right-hand

768 side.

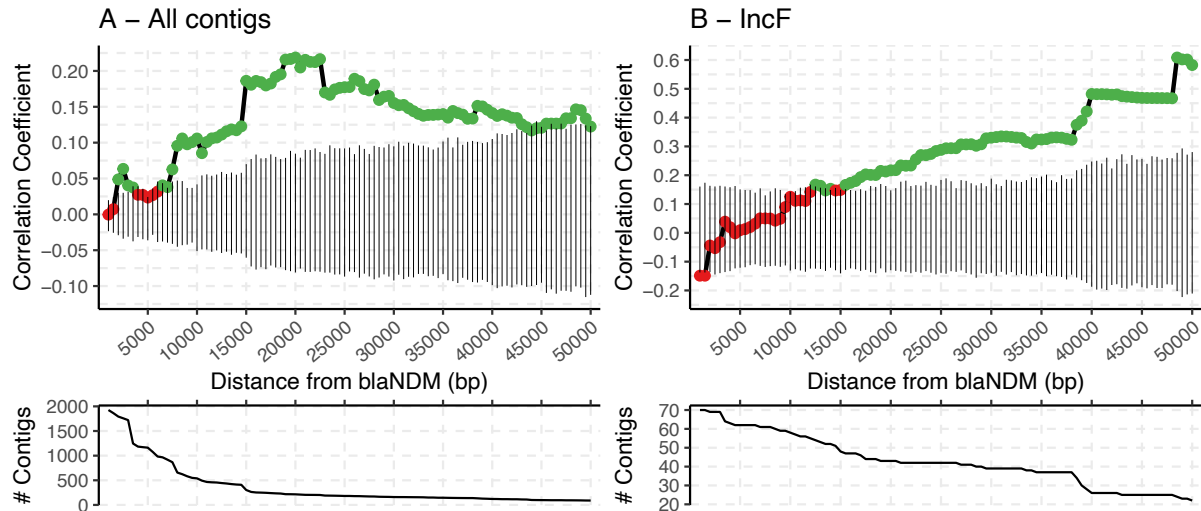

769  
770

**Figure 4. The spearman correlation estimates between genetic and geographic distance of**  
**NDM-positive contigs as the DNA sequence upon which the genetic distance is measured is**  
**increased downstream of *bla*<sub>NDM</sub> gene.** The exact Jaccard index, an alignment-free metric, was  
used as a measure of genetic distance. Geographic distance between samples was estimated by the  
*geodist* (v0.0.6) R package using sampling coordinates or sampling country centroids if the former  
had not been provided. The analysis was performed on all contigs in the dataset that carry the *bla*<sub>NDM</sub>  
gene (A) and the ones with confirmed IncF replicon type (B). In both cases, the genetic and  
geographic distance was measured between all pairs of contigs from a different BioProject which  
yielded two distance matrices: genetic and geographic. The Spearman correlation was then estimated  
between the two matrices and its significance evaluated using Mantel (randomization) test. Significant  
Spearman correlations (p-value <0.05) are indicated with green points and non-significant correlations  
with the red point, while the black vertical lines provide the 95% confidence interval of 1,000 Mantel  
test permutations. The genetic distance matrix and subsequent Spearman correlation were estimated  
multiple times by increasing the assessed DNA sequence starting from *bla*<sub>NDM</sub> gene and continuing  
downstream. The two plots below the correlation graphs indicate the number of contigs used in the  
correlation analysis as the assessed DNA sequence is increased. See Supplementary Figure 12 for  
correlation analysis on IncX3 and IncN plasmids.

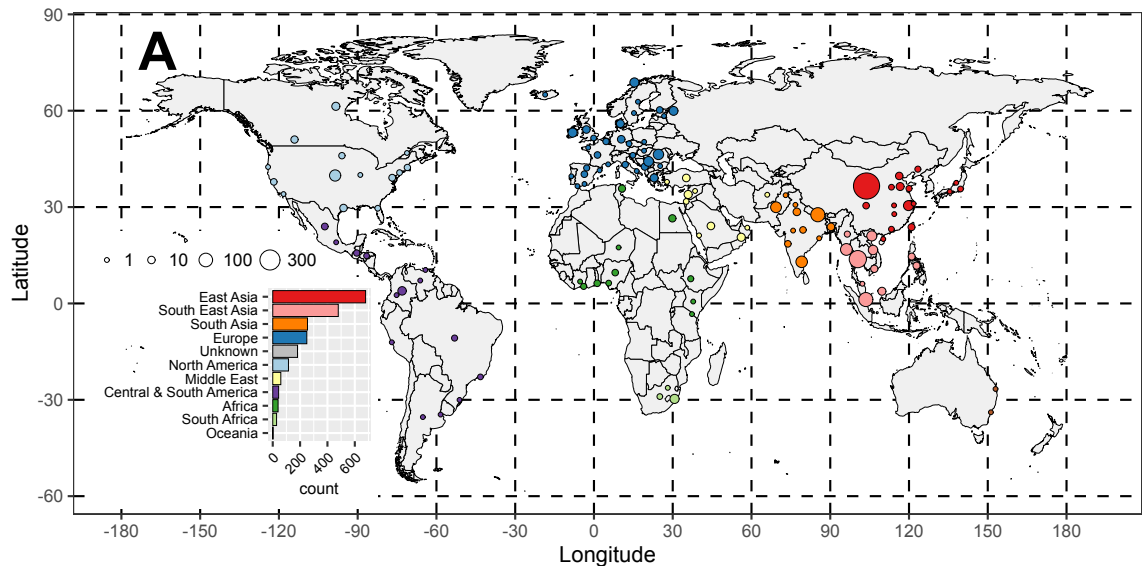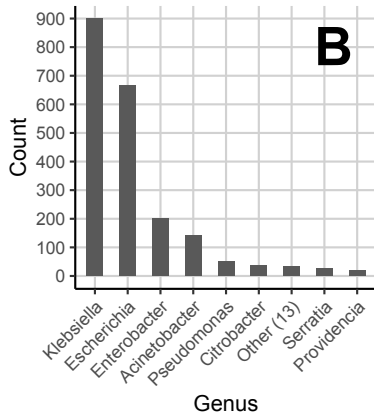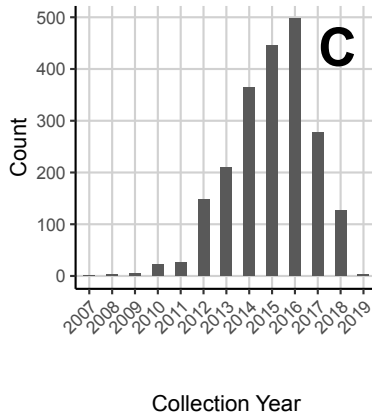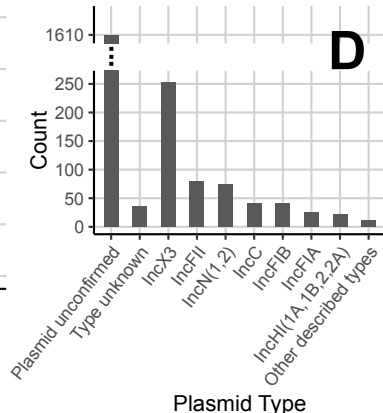

**A**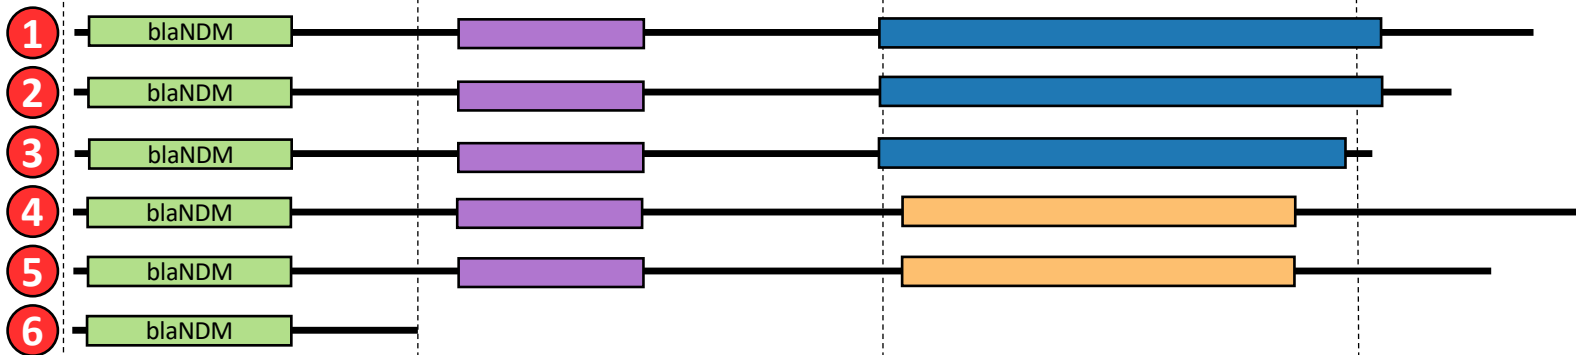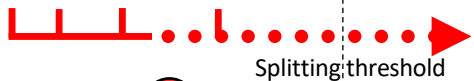**B**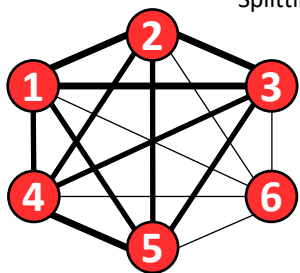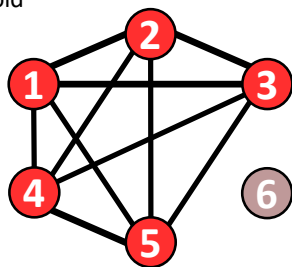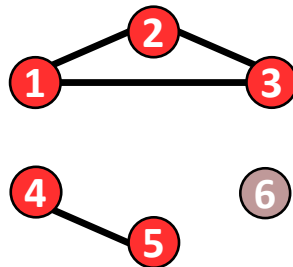**C**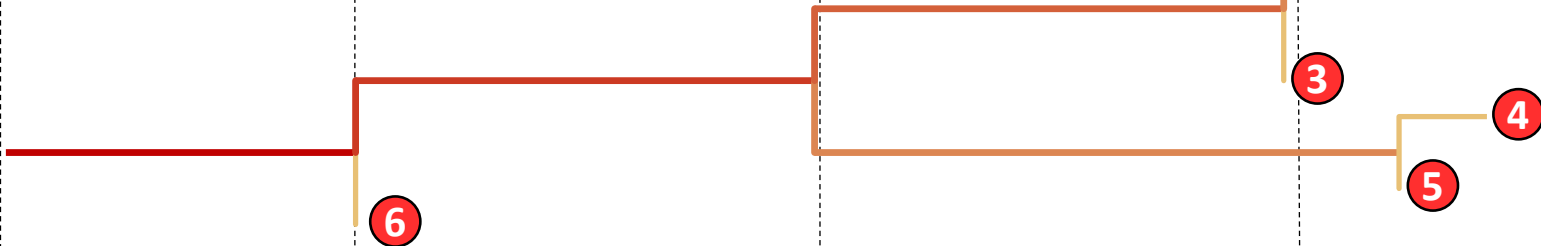

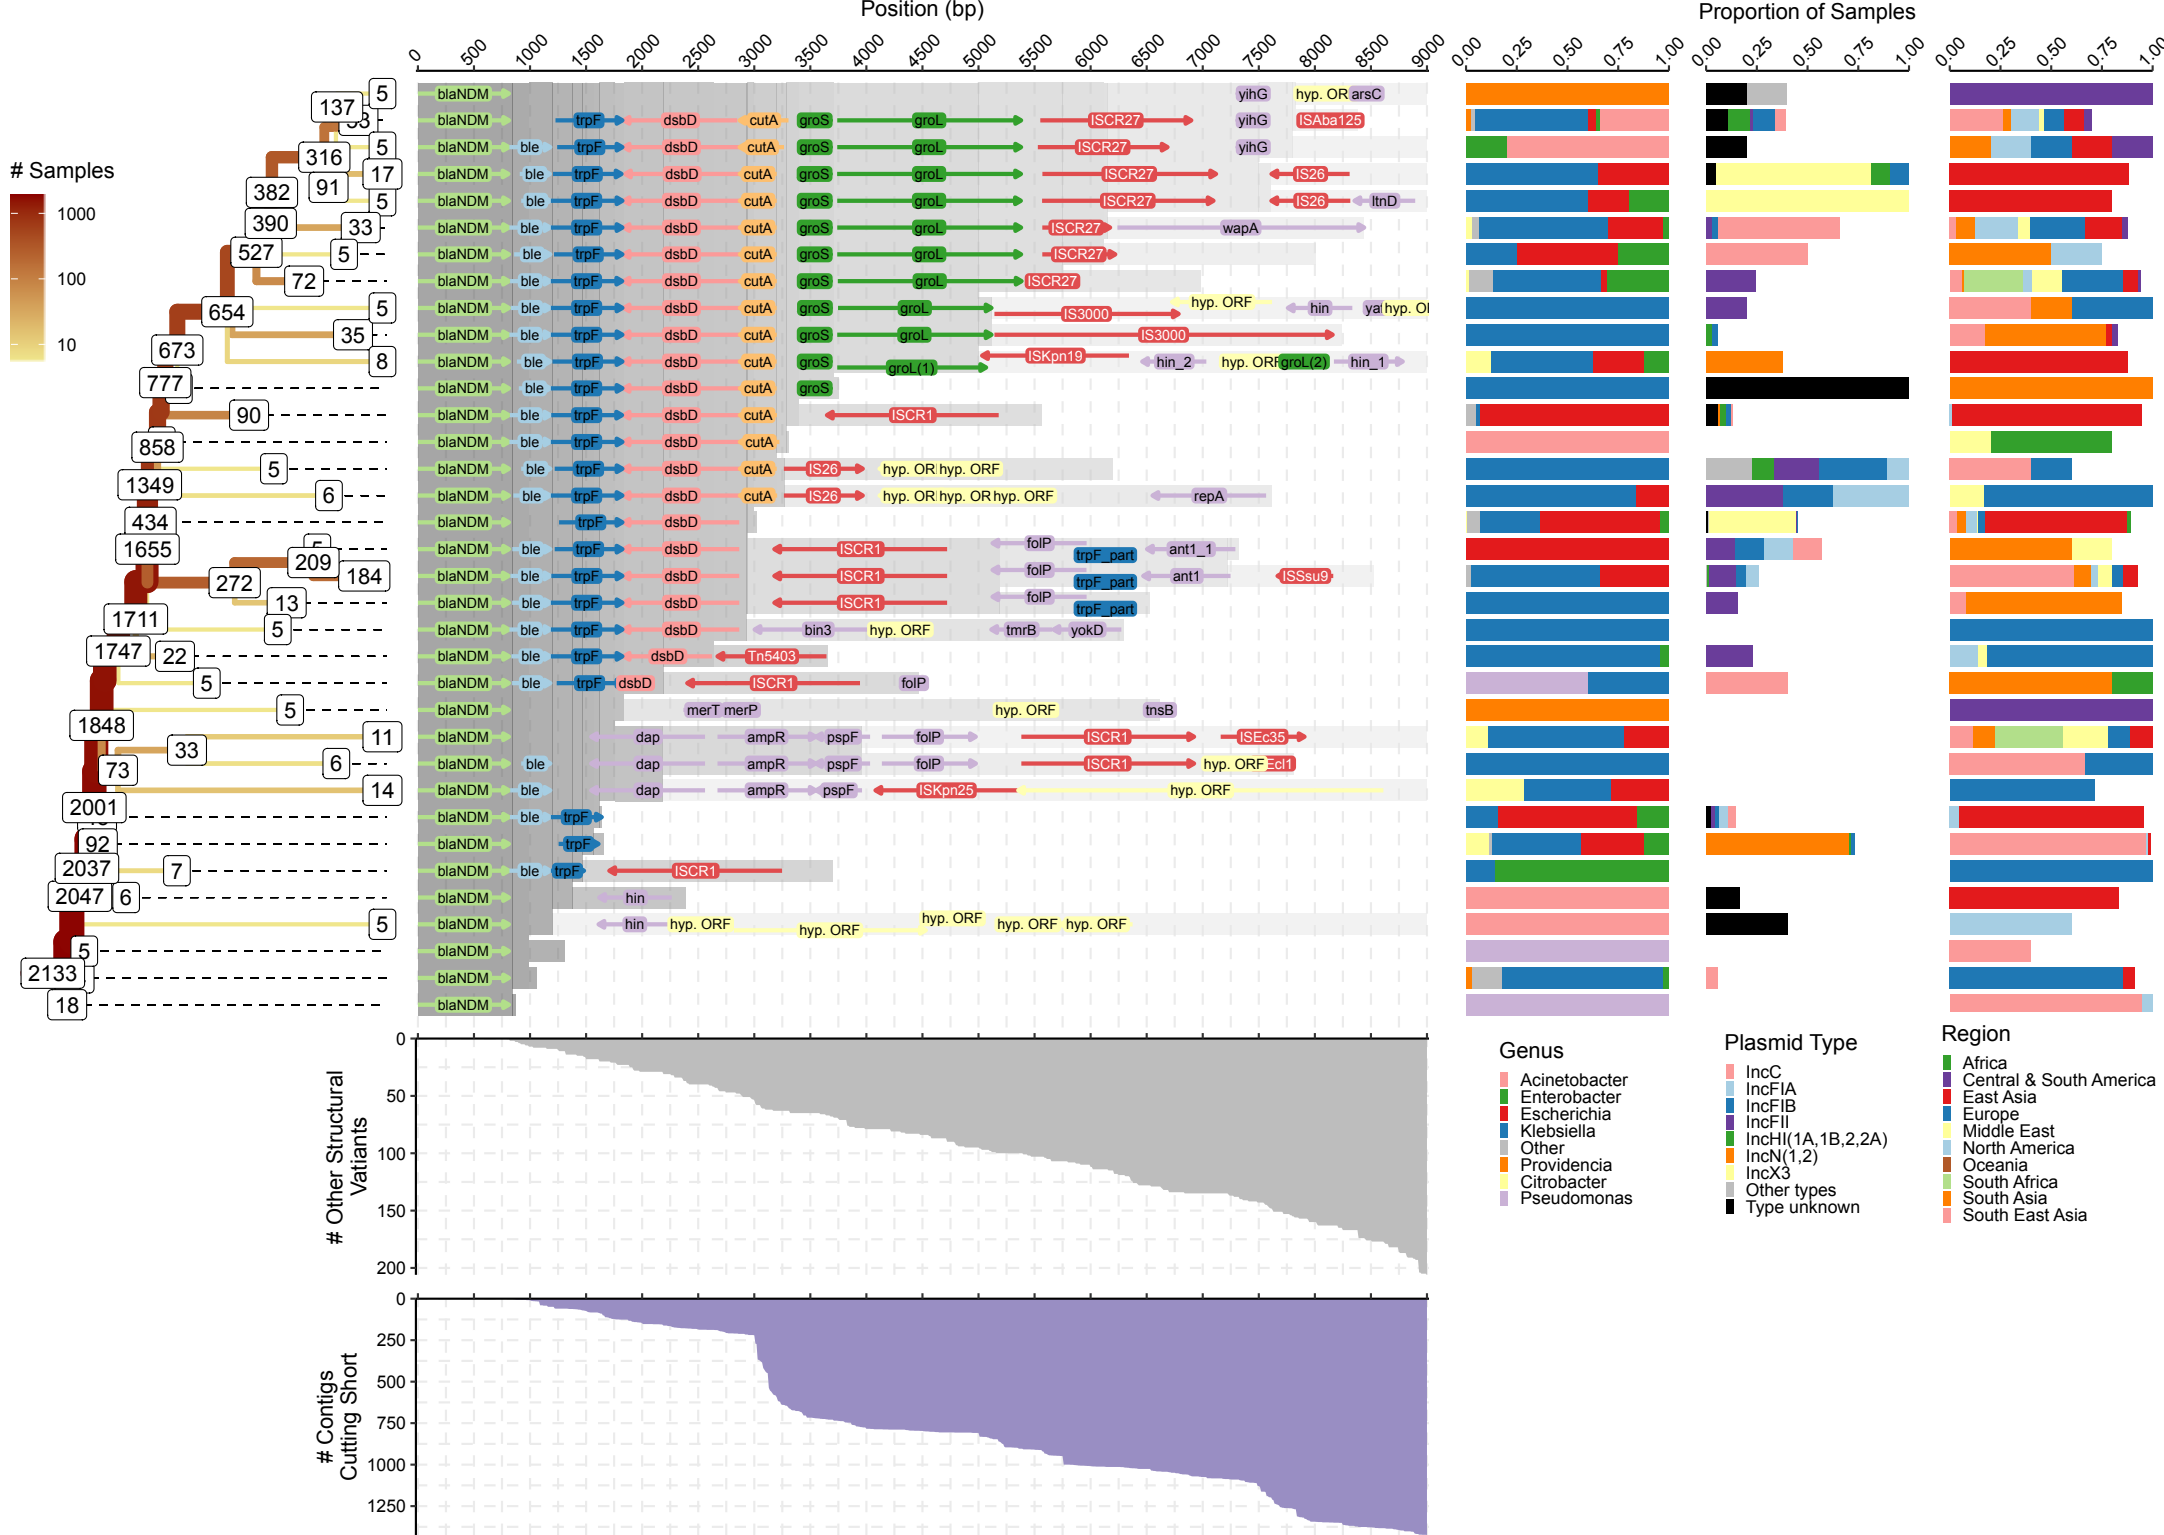

**A – All contigs**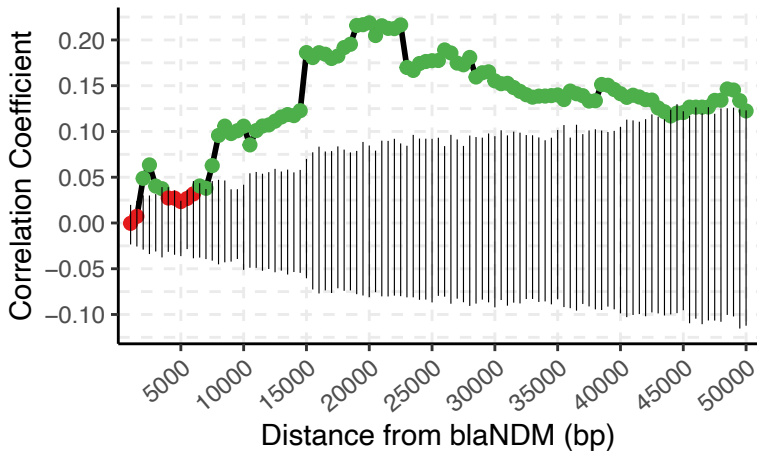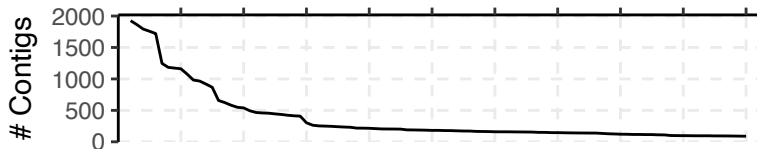**B – IncF**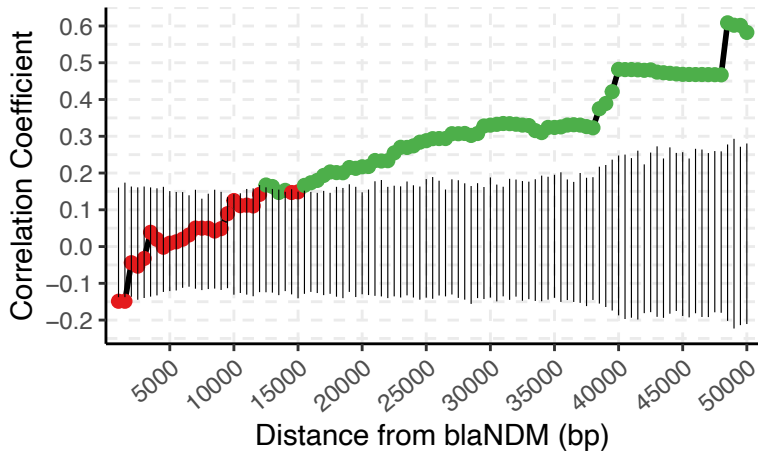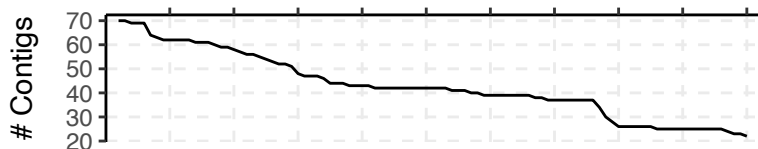

Source: https://biorxiv.org/content/10.1101/2021.01.14.426698v1.full.pdf
